# Supplementary material for: Partitioning between polyurethane foam and the gas phase: data compilation, uncertainty estimation and implications for air sampling
Source: Royal Society of Chemistry journal article supplement (doi:10.1039/d1em00036e), 2021-01-01
Supplement: d1em00036e1.xlsx [file d1em00036e1.xlsx]

## Sheet: Shoeib & Harner 2002
				2,2',5-Trichlorobiphenyl	2,2',4-Trichlorobiphenyl /4,4'-Dichlorobiphenyl	2,2',3-Trichlorobipheny / 2,4',6-Trichlorobiphenyl	2,4,5-Trichlorobiphenyl	2,4,4'-Trichlorobiphenyl	2,3',4'-Trichlorobiphenyl	2,2',5,5'-Tetrachlorobiphenyl
			CAS-RN	37680-65-2	37680-66-3	38444-78-9	15862-07-4	7012-37-5	38444-86-9	35693-99-3
			SMILES	Clc1ccc(c(c1)c1ccccc1Cl)Cl	Clc1ccc(c(c1)Cl)c1ccccc1Cl	Clc1ccccc1c1cccc(c1Cl)Cl	Clc1cc(Cl)c(cc1c1ccccc1)Cl	Clc1ccc(cc1)c1ccc(cc1Cl)Cl	Clc1cc(ccc1Cl)c1ccccc1Cl	Clc1ccc(cc1c1cc(Cl)ccc1Cl)Cl
			E	1.75	1.74	1.75	1.77	1.76	1.77	1.9
			S	1.35	1.35	1.35	1.33	1.33	1.33	1.48
			A	0	0	0	0	0	0	0
			B	0.17	0.17	0.17	0.15	0.15	0.15	0.15
			V	1.6914	1.6914	1.6914	1.6914	1.6914	1.6914	1.8138
			L	7.48	7.521	7.647	7.722	7.904	8.01	8.144
			source of solute descriptors	Abraham, M. H., Al-Hussaini, A. J. M. (2005) J. Env. Monitor., 7, 295-301.	Abraham, M. H., Al-Hussaini, A. J. M. (2005) J. Env. Monitor., 7, 295-301.	Abraham, M. H., Al-Hussaini, A. J. M. (2005) J. Env. Monitor., 7, 295-301.	Abraham, M. H., Al-Hussaini, A. J. M. (2005) J. Env. Monitor., 7, 295-301.	Abraham, M. H., Al-Hussaini, A. J. M. (2005) J. Env. Monitor., 7, 295-301.	Abraham, M. H., Al-Hussaini, A. J. M. (2005) J. Env. Monitor., 7, 295-301.	Abraham, M. H., Al-Hussaini, A. J. M. (2005) J. Env. Monitor., 7, 295-301.
			Log KPUF/G (15℃) in mLair/gsorbent	7.94798	7.97709	8.06655	8.0872	8.21642	8.29168	8.66437
			ΔU PUF/G, J/mol	-72478.2	-72654.5	-73196.3	-73166.8	-73949.4	-74405.2	-79188.2
			The density of PUF (g/cm3)	0.0213
				Original empirical values
				Log KPUF/G (m3/g)	Log KPUF/G (m3/g)	Log KPUF/G (m3/g)	Log KPUF/G (m3/g)	Log KPUF/G (m3/g)	Log KPUF/G (m3/g)	Log KPUF/G (m3/g)
		Mean Temperature (℃)	Mean Temperature (K)	2,2',5-Trichlorobiphenyl	2,2',4-Trichlorobiphenyl /4,4'-Dichlorobiphenyl	2,2',3-Trichlorobipheny / 2,4',6-Trichlorobiphenyl	2,4,5-Trichlorobiphenyl	2,4,4'-Trichlorobiphenyl	2,3',4'-Trichlorobiphenyl	2,2',5,5'-Tetrachlorobiphenyl
		23	296.15	1.75	1.65	1.83	1.93	2.12	2.04	2.16
			Predicted values	Empiricall Log (KPUF/G / ml/g) values
			Log (KPUF/G / ml/g)	Log (KPUF/G / ml/g)	Log (KPUF/G / ml/g)	Log (KPUF/G / ml/g)	Log (KPUF/G / ml/g)	Log (KPUF/G / ml/g)	Log (KPUF/G / ml/g)	Log (KPUF/G / ml/g)
	Mean Temperature (℃)	Mean Temperature (K)		2,2',5-Trichlorobiphenyl	2,2',4-Trichlorobiphenyl /4,4'-Dichlorobiphenyl	2,2',3-Trichlorobipheny / 2,4',6-Trichlorobiphenyl	2,4,5-Trichlorobiphenyl	2,4,4'-Trichlorobiphenyl	2,3',4'-Trichlorobiphenyl	2,2',5,5'-Tetrachlorobiphenyl
	23	296.15	7.59305	7.75
		296.15	7.6213		7.65
		296.15	7.7081			7.83
		296.15	7.7289				7.93
		296.15	7.85428					8.12
		296.15	7.92731						8.04
		296.15	8.27658							8.16
																											7
																											11

## Sheet: Zhao et al., 2004
				Naphthalene	1,2,4-Trimethylbenzene	Styrene	p-Xylene	Ethylbenzene	Chlorobenzene	Toluene	Benzene
			CAS-RN	91-20-3	95-63-6	100-42-5	106-42-3	100-41-4	108-90-7	108-88-3	71-43-2
			SMILES	C1=CC=C2C=CC=CC2=C1	CC1=CC(=C(C=C1)C)C	C=CC1=CC=CC=C1	CC1=CC=C(C=C1)C	CCC1=CC=CC=C1	C1=CC=C(C=C1)Cl	CC1=CC=CC=C1	C1=CC=CC=C1
			E	1.34	0.68	0.85	0.61	0.61	0.72	0.6	0.61
			S	0.92	0.56	0.65	0.52	0.51	0.65	0.52	0.52
			A	0	0	0	0	0	0	0	0
			B	0.2	0.19	0.16	0.16	0.15	0.07	0.14	0.14
			V	1.0854	1.1391	0.9552	0.9982	0.9982	0.8388	0.8573	0.7164
			L	5.161	4.441	3.856	3.839	3.778	3.657	3.325	2.786
			source of solute descriptors	Sprunger, L., Proctor, A., Acree, W. E., Abraham, M. H. (2007) J. Chromatogr. A, 1175, 162-173.	Sprunger, L., Proctor, A., Acree, W. E., Abraham, M. H. (2007) J. Chromatogr. A, 1175, 162-173.	Sprunger, L., Proctor, A., Acree, W. E., Abraham, M. H. (2007) J. Chromatogr. A, 1175, 162-173.	Sprunger, L., Proctor, A., Acree, W. E., Abraham, M. H. (2007) J. Chromatogr. A, 1175, 162-173.	Sprunger, L., Proctor, A., Acree, W. E., Abraham, M. H. (2007) J. Chromatogr. A, 1175, 162-173.	Sprunger, L., Proctor, A., Acree, W. E., Abraham, M. H. (2007) J. Chromatogr. A, 1175, 162-173.	Sprunger, L., Proctor, A., Acree, W. E., Abraham, M. H. (2007) J. Chromatogr. A, 1175, 162-173.	Sprunger, L., Proctor, A., Acree, W. E., Abraham, M. H. (2007) J. Chromatogr. A, 1175, 162-173.
			Log KPUF/G (15℃) in mLair/gsorbent	5.43697	4.35347	4.03516	3.8228	3.76319	3.86245	3.41982	2.99909
			ΔU PUF/G, J/mol	-47181.7	-38437.1	-35151.7	-33341	-32902.7	-32806.1	-29327.3	-25206
			The density of PUF (g/cm3)	0.022
				Original empirical values
				KPUF/G	KPUF/G	KPUF/G	KPUF/G	KPUF/G	KPUF/G	KPUF/G	KPUF/G
		Mean Temperature (℃)	Mean Temperature (K)	Naphthalene	1,2,4-Trimethylbenzene	Styrene	p-Xylene	Ethylbenzene	Chlorobenzene	Toluene	Benzene
		21	294.15	6400	440	310	130	110	140	58	19
			Predicted values	Empiricall Log (KPUF/G / ml/g) values
			Log (KPUF/G / ml/g)	Log (KPUF/G / ml/g)	Log (KPUF/G / ml/g)	Log (KPUF/G / ml/g)	Log (KPUF/G / ml/g)	Log (KPUF/G / ml/g)	Log (KPUF/G / ml/g)	Log (KPUF/G / ml/g)	Log (KPUF/G / ml/g)
	Mean Temperature (℃)	Mean Temperature (K)		Naphthalene	1,2,4-Trimethylbenzene	Styrene	p-Xylene	Ethylbenzene	Chlorobenzene	Toluene	Benzene
	21	294.15	5.2625	5.46376
		294.15	4.21134		4.30103
		294.15	3.90518			4.14894
		294.15	3.69952				3.77152
		294.15	3.64153					3.69897
		294.15	3.74114						3.80371
		294.15	3.31138							3.42101
		294.15	2.90588								2.93633

## Sheet: Kamprad & Goss 2007
				n-Hexane	n-Heptane	n-Octane	n-Nonane	n-Decane	n-Undecane	n-Dodecane	n-Tridecane	n-Tetradecane	Cycloheptane	Oct-1-ene	Non-1-ene	Hept-1-yne	Oct-1-yne	Methanol	Ethanol	Propan-1-ol	Butan-1-ol	Pentan-1-ol	Hexan-1-ol	Heptan-1-ol	Benzyl alcohol	Phenol	o-Cresol	m-Cresol	p-Cresol	2-Chlorophenol	2,3-Dichlorophenol	2,6-Dichlorophenol	2-Propanone	2-Butanone	Pentan-2-one	Hexan-2-one	Heptan-2-one	3-Methylbutan-2-one	Acetophenone	Methyl acetate	Ethyl acetate	n-Propyl acetate	n-Butyl acetate	n-Pentyl acetate	Benzyl acetate	Diethyl ether	Di-n-propyl ether	Diisopropyl ether	Di-n-butyl ether
			CAS-RN	110-54-3	142-82-5	111-65-9	111-84-2	124-18-5	1120-21-4	112-40-3	629-50-5	629-59-4	291-64-5	111-66-0	124-11-8	628-71-7	629-05-0	67-56-1	64-17-5	71-23-8	71-36-3	71-41-0	111-27-3	111-70-6	100-51-6	108-95-2	95-48-7	108-39-4	106-44-5	95-57-8	576-24-9	87-65-0	67-64-1	78-93-3	107-87-9	591-78-6	110-43-0	563-80-4	98-86-2	79-20-9	141-78-6	109-60-4	123-86-4	628-63-7	140-11-4	60-29-7	111-43-3	108-20-3	142-96-1
			SMILES	CCCCCC	CCCCCCC	CCCCCCCC	CCCCCCCCC	CCCCCCCCCC	CCCCCCCCCCC	CCCCCCCCCCCC	CCCCCCCCCCCCC	CCCCCCCCCCCCCC	C1CCCCCC1	CCCCCCC=C	CCCCCCCC=C	CCCCCC#C	CCCCCCC#C	CO	CCO	CCCO	CCCCO	CCCCCO	CCCCCCO	CCCCCCCO	OCc1ccccc1	Oc1ccccc1	Cc1ccccc1O	Cc1cccc(c1)O	Cc1ccc(cc1)O	Oc1ccccc1Cl	Clc1c(O)cccc1Cl	Clc1cccc(c1O)Cl	CC(=O)C	CCC(=O)C	CCCC(=O)C	CCCCC(=O)C	CCCCCC(=O)C	CC(=O)C(C)C	CC(=O)c1ccccc1	COC(=O)C	CCOC(=O)C	CCCOC(=O)C	CCCCOC(=O)C	CCCCCOC(=O)C	CC(=O)OCc1ccccc1	CCOCC	CCCOCCC	CC(OC(C)C)C	CCCCOCCCC
			E	0	0	0	0	0	0	0	0	0	0.35	0.09	0.09	0.16	0.16	0.28	0.25	0.24	0.22	0.22	0.21	0.21	0.8	0.81	0.84	0.82	0.82	0.85	0.96	0.9	0.18	0.17	0.14	0.14	0.12	0.13	0.82	0.14	0.11	0.09	0.07	0.07	0.8	0.04	0.01	-0.06	0
			S	0	0	0	0	0	0	0	0	0	0.1	0.08	0.08	0.23	0.23	0.44	0.42	0.42	0.42	0.42	0.42	0.42	0.87	0.89	0.86	0.88	0.87	0.88	0.94	0.86	0.7	0.7	0.68	0.68	0.68	0.65	1.01	0.64	0.62	0.6	0.6	0.6	0.85	0.26	0.22	0.2	0.25
			A	0	0	0	0	0	0	0	0	0	0	0	0	0.13	0.13	0.43	0.37	0.37	0.37	0.37	0.37	0.37	0.33	0.6	0.52	0.57	0.57	0.32	0.48	0.36	0.04	0	0	0	0	0	0	0	0	0	0	0	0	0	0	0	0
			B	0	0	0	0	0	0	0	0	0	0	0.07	0.07	0.1	0.1	0.47	0.48	0.48	0.48	0.48	0.48	0.48	0.56	0.3	0.31	0.34	0.32	0.31	0.2	0.24	0.49	0.51	0.51	0.51	0.51	0.51	0.48	0.45	0.45	0.45	0.45	0.45	0.65	0.44	0.44	0.54	0.45
			V	0.954	1.0949	1.2358	1.3767	1.5176	1.6585	1.7994	1.9403	2.0812	0.9863	1.1928	1.3337	1.0089	1.1498	0.3082	0.4491	0.59	0.7309	0.8718	1.0127	1.1536	0.916	0.7751	0.916	0.916	0.916	0.8975	1.0199	1.0199	0.547	0.6879	0.8288	0.9697	1.1106	0.8288	1.0139	0.6057	0.7466	0.8875	1.0284	1.1693	1.2135	0.7309	1.0127	1.0127	1.2945
			L	2.668	3.173	3.677	4.182	4.686	5.191	5.696	6.2	6.705	3.704	3.568	4.073	3	3.521	0.97	1.485	2.031	2.601	3.106	3.61	4.115	4.221	3.766	4.218	4.31	4.312	4.178	4.978	4.777	1.696	2.287	2.755	3.286	3.76	2.692	4.501	1.911	2.314	2.819	3.353	3.844	5.03	2.012	2.803	2.517	3.924
			source of solute descriptors	Sprunger, L., Proctor, A., Acree, W. E., Abraham, M. H. (2007) J. Chromatogr. A, 1175, 162-173.	Sprunger, L., Proctor, A., Acree, W. E., Abraham, M. H. (2007) J. Chromatogr. A, 1175, 162-173.	Sprunger, L., Proctor, A., Acree, W. E., Abraham, M. H. (2007) J. Chromatogr. A, 1175, 162-173.	Sprunger, L., Proctor, A., Acree, W. E., Abraham, M. H. (2007) J. Chromatogr. A, 1175, 162-173.	Sprunger, L., Proctor, A., Acree, W. E., Abraham, M. H. (2007) J. Chromatogr. A, 1175, 162-173.	Sprunger, L., Proctor, A., Acree, W. E., Abraham, M. H. (2007) J. Chromatogr. A, 1175, 162-173.	Sprunger, L., Proctor, A., Acree, W. E., Abraham, M. H. (2007) J. Chromatogr. A, 1175, 162-173.	Abraham, M. H., Ibrahim, A. (2006) J. Chem. Inf. Model., 46, 1735-1741.	Abraham, M. H., Ibrahim, A. (2006) J. Chem. Inf. Model., 46, 1735-1741.	Abraham, M. H., Ibrahim, A., Acree, Jr. W. E. (2007) Fluid Phase Eq., 251, 93.	Abraham, M. H., Andonian-Haftvan, J., Whiting, G. S., Leo, A., Taft, R. S. (1994) J. Chem. Soc. Perkin Trans., 2, 1777-1791.	Abraham, M. H., Andonian-Haftvan, J., Whiting, G. S., Leo, A., Taft, R. S. (1994) J. Chem. Soc. Perkin Trans., 2, 1777-1791.	Abraham, M. H., Andonian-Haftvan, J., Whiting, G. S., Leo, A., Taft, R. S. (1994) J. Chem. Soc. Perkin Trans., 2, 1777-1791.	Abraham, M. H., Andonian-Haftvan, J., Whiting, G. S., Leo, A., Taft, R. S. (1994) J. Chem. Soc. Perkin Trans., 2, 1777-1791.	Grate, J. W., Abraham, M. H., Du, C. M., McGill, R. A., Shuely, W. J. (1995) Langmuir, 11, 2125-2130.	Sprunger, L., Proctor, A., Acree, W. E., Abraham, M. H. (2007) J. Chromatogr. A, 1175, 162-173.	Sprunger, L., Proctor, A., Acree, W. E., Abraham, M. H. (2007) J. Chromatogr. A, 1175, 162-173.	Abraham, M. H., Andonian-Haftvan, J., Whiting, G. S., Leo, A., Taft, R. S. (1994) J. Chem. Soc. Perkin Trans., 2, 1777-1791.	Sprunger, L., Proctor, A., Acree, W. E., Abraham, M. H. (2007) J. Chromatogr. A, 1175, 162-173.	Abraham, M. H., Andonian-Haftvan, J., Whiting, G. S., Leo, A., Taft, R. S. (1994) J. Chem. Soc. Perkin Trans., 2, 1777-1791.	Abraham, M. H., Andonian-Haftvan, J., Whiting, G. S., Leo, A., Taft, R. S. (1994) J. Chem. Soc. Perkin Trans., 2, 1777-1791.	Sprunger, L., Proctor, A., Acree, W. E., Abraham, M. H. (2007) J. Chromatogr. A, 1175, 162-173.	Sprunger, L., Proctor, A., Acree, W. E., Abraham, M. H. (2007) J. Chromatogr. A, 1175, 162-173.	Abraham, M. H., Andonian-Haftvan, J., Whiting, G. S., Leo, A., Taft, R. S. (1994) J. Chem. Soc. Perkin Trans., 2, 1777-1791.	Sprunger, L., Proctor, A., Acree, W. E., Abraham, M. H. (2007) J. Chromatogr. A, 1175, 162-173.	Abraham, M. H., Andonian-Haftvan, J., Whiting, G. S., Leo, A., Taft, R. S. (1994) J. Chem. Soc. Perkin Trans., 2, 1777-1791.	Sprunger, L., Proctor, A., Acree, W. E., Abraham, M. H. (2007) J. Chromatogr. A, 1175, 162-173.	Torres-Lapasio, J. R., Garcia-Alvarez-Coque, M. C., Roses, M., Bosch, E., Zissimos, A. M., Abraham, M. H. (2004) Anal. Chim. Acta, 515, 209-227.	LSER Dataset 2017	Sprunger, L., Proctor, A., Acree, W. E., Abraham, M. H. (2007) J. Chromatogr. A, 1175, 162-173.	Sprunger, L., Proctor, A., Acree, W. E., Abraham, M. H. (2007) J. Chromatogr. A, 1175, 162-173.	Sprunger, L., Proctor, A., Acree, W. E., Abraham, M. H. (2007) J. Chromatogr. A, 1175, 162-173.	Sprunger, L., Proctor, A., Acree, W. E., Abraham, M. H. (2007) J. Chromatogr. A, 1175, 162-173.	Sprunger, L., Proctor, A., Acree, W. E., Abraham, M. H. (2007) J. Chromatogr. A, 1175, 162-173.	Abraham, M. H., Andonian-Haftvan, J., Whiting, G. S., Leo, A., Taft, R. S. (1994) J. Chem. Soc. Perkin Trans., 2, 1777-1791.	Sprunger, L., Proctor, A., Acree, W. E., Abraham, M. H. (2007) J. Chromatogr. A, 1175, 162-173.	Abraham, M. H., Andonian-Haftvan, J., Whiting, G. S., Leo, A., Taft, R. S. (1994) J. Chem. Soc. Perkin Trans., 2, 1777-1791.	Sprunger, L., Proctor, A., Acree, W. E., Abraham, M. H. (2007) J. Chromatogr. A, 1175, 162-173.	Abraham, M. H., Andonian-Haftvan, J., Whiting, G. S., Leo, A., Taft, R. S. (1994) J. Chem. Soc. Perkin Trans., 2, 1777-1791.	Abraham, M. H., Andonian-Haftvan, J., Whiting, G. S., Leo, A., Taft, R. S. (1994) J. Chem. Soc. Perkin Trans., 2, 1777-1791.	Abraham, M. H., Andonian-Haftvan, J., Whiting, G. S., Leo, A., Taft, R. S. (1994) J. Chem. Soc. Perkin Trans., 2, 1777-1791.	LSER Dataset 2017	Endo, S., Schmidt, T. C. (2006) Fluid Phase Eq., 246, 143-152.	Endo, S., Schmidt, T. C. (2006) Fluid Phase Eq., 246, 143-152.	Endo, S., Schmidt, T. C. (2006) Fluid Phase Eq., 246, 143-152.	Grate, J. W., Abraham, M. H., Du, C. M., McGill, R. A., Shuely, W. J. (1995) Langmuir, 11, 2125-2130.
			LogKpa (15℃) in mLair/gsorbent	2.13186	2.52845	2.92434	3.32093	3.71681	4.11341	4.51	4.90588	5.30247	3.03914	2.96574	3.36233	3.198	3.60596	2.92681	3.09451	3.52021	3.96295	4.35955	4.75543	5.15202	5.76103	6.34784	6.3867	6.65412	6.63924	5.70791	6.94915	6.26924	2.60845	2.9305	3.26823	3.68328	4.05786	3.1746	5.09576	2.54355	2.83512	3.19911	3.6163	4.00295	5.26445	2.02966	2.60216	2.3665	3.52305
			ΔU PUF-G, J/mol	-18587.9	-22562.9	-26533.7	-30508.7	-34479.4	-38454.4	-42429.4	-46400.2	-50375.2	-25216.2	-26922.6	-30897.6	-30824.2	-34868.1	-30802.3	-31672.3	-35823.6	-40078.1	-44053.2	-48023.9	-51998.9	-55469.4	-64643.4	-64134.5	-67212.1	-67044.7	-54757.7	-68276.4	-60412.1	-23382.7	-25863.5	-29327.5	-33414.3	-37256	-28528.6	-45012.5	-22138.6	-25323	-28946	-33045.7	-36960.6	-47026.1	-17487.4	-23791.8	-22210	-32747.1
			Predicted values	Original empirical Log (KPUF/G / ml/g) values
			Log (KPUF/G / ml/g)	Log (KPUF/G / ml/g)	Log (KPUF/G / ml/g)	Log (KPUF/G / ml/g)	Log (KPUF/G / ml/g)	Log (KPUF/G / ml/g)	Log (KPUF/G / ml/g)	Log (KPUF/G / ml/g)	Log (KPUF/G / ml/g)	Log (KPUF/G / ml/g)	Log (KPUF/G / ml/g)	Log (KPUF/G / ml/g)	Log (KPUF/G / ml/g)	Log (KPUF/G / ml/g)	Log (KPUF/G / ml/g)	Log (KPUF/G / ml/g)	Log (KPUF/G / ml/g)	Log (KPUF/G / ml/g)	Log (KPUF/G / ml/g)	Log (KPUF/G / ml/g)	Log (KPUF/G / ml/g)	Log (KPUF/G / ml/g)	Log (KPUF/G / ml/g)	Log (KPUF/G / ml/g)	Log (KPUF/G / ml/g)	Log (KPUF/G / ml/g)	Log (KPUF/G / ml/g)	Log (KPUF/G / ml/g)	Log (KPUF/G / ml/g)	Log (KPUF/G / ml/g)	Log (KPUF/G / ml/g)	Log (KPUF/G / ml/g)	Log (KPUF/G / ml/g)	Log (KPUF/G / ml/g)	Log (KPUF/G / ml/g)	Log (KPUF/G / ml/g)	Log (KPUF/G / ml/g)	Log (KPUF/G / ml/g)	Log (KPUF/G / ml/g)	Log (KPUF/G / ml/g)	Log (KPUF/G / ml/g)	Log (KPUF/G / ml/g)	Log (KPUF/G / ml/g)	Log (KPUF/G / ml/g)	Log (KPUF/G / ml/g)	Log (KPUF/G / ml/g)	Log (KPUF/G / ml/g)
	Mean Temperature (℃)	Mean Temperature (K)		n-Hexane	n-Heptane	n-Octane	n-Nonane	n-Decane	n-Undecane	n-Dodecane	n-Tridecane	n-Tetradecane	Cycloheptane	Oct-1-ene	Non-1-ene	Hept-1-yne	Oct-1-yne	Methanol	Ethanol	Propan-1-ol	Butan-1-ol	Pentan-1-ol	Hexan-1-ol	Heptan-1-ol	Benzyl alcohol	Phenol	o-Cresol	m-Cresol	p-Cresol	2-Chlorophenol	2,3-Dichlorophenol	2,6-Dichlorophenol	2-Propanone	2-Butanone	Pentan-2-one	Hexan-2-one	Heptan-2-one	3-Methylbutan-2-one	Acetophenone	Methyl acetate	Ethyl acetate	n-Propyl acetate	n-Butyl acetate	n-Pentyl acetate	Benzyl acetate	Diethyl ether	Di-n-propyl ether	Diisopropyl ether	Di-n-butyl ether
	15	288.15	2.13186	2.05
	35	308.15	1.91316	1.84
	15	288.15	2.52845		2.51
	35	308.15	2.26298		2.16
	65	338.15	1.92365
	95	368.15	1.63963
	15	288.15	2.92434			2.94
	35	308.15	2.61214			2.61
	65	338.15	2.2131			2.04
	95	368.15	1.87909
	15	288.15	3.32093				3.43
	35	308.15	2.96197				2.96
	65	338.15	2.50314				2.36
	95	368.15	2.1191				1.93
	15	288.15	3.71681					3.87
	35	308.15	3.31113					3.36
	65	338.15	2.79259					2.69
	95	368.15	2.35856					2.3
	15	288.15	4.11341
	35	308.15	3.66096						3.77
	65	338.15	3.08263						3.06
	95	368.15	2.59856						2.64
	15	288.15	4.51
	35	308.15	4.01078							4.16
	65	338.15	3.37268							3.36
	95	368.15	2.83857							2.79
	15	288.15	4.90588
	35	308.15	4.35994
	65	338.15	3.66212								3.7
	95	368.15	3.07803								3.04
	15	288.15	5.30247
	35	308.15	4.70977
	65	338.15	3.95217									4.06
	95	368.15	3.31804									3.35
	15	288.15	3.03914										3.08
	35	308.15	2.74245										2.67
	65	338.15	2.36322										2.3
	95	368.15	2.0458										1.81
	15	288.15	2.96574											3.05
	35	308.15	2.64897											2.62
	65	338.15	2.24408											2.14
	95	368.15	1.90517											1.72
	15	288.15	3.36233												3.48
	35	308.15	2.99879												3.01
	65	338.15	2.53412												2.41
	95	368.15	2.14518												1.96
	15	288.15	3.198													3.1
	35	308.15	2.83533													2.66
	65	338.15	2.37176													2.14
	95	368.15	1.98374													1.9
	15	288.15	3.60596														3.53
	35	308.15	3.1957														3.04
	65	338.15	2.67132														2.42
	95	368.15	2.23239														2
	15	288.15	2.92681															3.04
	35	308.15	2.5644															2.53
	65	338.15	2.10116
	95	368.15	1.71341
	15	288.15	3.09451																3.13
	35	308.15	2.72186																2.68
	65	338.15	2.24553																2.07
	95	368.15	1.84683
	15	288.15	3.52021																	3.48
	35	308.15	3.09871																	2.99
	65	338.15	2.55996																	2.36
	95	368.15	2.109																	1.87
	15	288.15	3.96295																		3.88
	35	308.15	3.4914																		3.42
	65	338.15	2.88866																		2.67
	95	368.15	2.38415																		2.15
	15	288.15	4.35955																			4.41
	35	308.15	3.84122																			3.76
	65	338.15	3.1787																			3.05
	95	368.15	2.62415																			2.42
	15	288.15	4.75543
	35	308.15	4.19039
	65	338.15	3.46815																				3.31
	95	368.15	2.86362																				2.7
	15	288.15	5.15202
	35	308.15	4.54021
	65	338.15	3.75819
	95	368.15	3.10362																					3.07
	15	288.15	5.76103
	35	308.15	5.10838
	65	338.15	4.27417
	95	368.15	3.57591																						3.73
	15	288.15	6.34784
	35	308.15	5.58725
	65	338.15	4.61507
	95	368.15	3.80133																							3.94
	15	288.15	6.3867
	35	308.15	5.6321
	65	338.15	4.66757
	95	368.15	3.86024																								3.94
	15	288.15	6.65412
	35	308.15	5.86331
	65	338.15	4.8525
	95	368.15	4.00642																									4.12
	15	288.15	6.63924
	35	308.15	5.8504
	65	338.15	4.8421
	95	368.15	3.99814																										4.11
	15	288.15	5.70791
	35	308.15	5.06363
	65	338.15	4.24012																											4.32
	95	368.15	3.55083																											3.57
	15	288.15	6.94915
	35	308.15	6.14582
	65	338.15	5.119
	95	368.15	4.25953																												4.31
	15	288.15	6.26924
	35	308.15	5.55844
	65	338.15	4.64989
	95	368.15	3.88942																													4.17
	15	288.15	2.60845																														2.58
	35	308.15	2.33333																														2.52
	65	338.15	1.98168
	95	368.15	1.68733
	15	288.15	2.9305																															2.89
	35	308.15	2.6262																															2.81
	65	338.15	2.23723																															2.13
	95	368.15	1.91166																															1.66
	15	288.15	3.26823																																3.24
	35	308.15	2.92316																																2.78
	65	338.15	2.4821																																2.58
	95	368.15	2.11292																																1.97
	15	288.15	3.68328
	35	308.15	3.29013
	65	338.15	2.78761
	95	368.15	2.36698																																	2.14
	15	288.15	4.05786
	35	308.15	3.61951
	65	338.15	3.05921
	95	368.15	2.59023																																		2.39
	15	288.15	3.1746																																			2.94
	35	308.15	2.83893																																			2.66
	65	338.15	2.40989																																			2.2
	95	368.15	2.05077																																			1.76
	15	288.15	5.09576
	35	308.15	4.56615
	65	338.15	3.8892
	95	368.15	3.32258																																				3.24
	15	288.15	2.54355																																					2.62
	35	308.15	2.28307																																					2.36
	65	338.15	1.95012
	95	368.15	1.67144
	15	288.15	2.83512																																						2.85
	35	308.15	2.53718																																						2.57
	65	338.15	2.15634																																						2.03
	95	368.15	1.83757
	15	288.15	3.19911																																							3.22
	35	308.15	2.85854																																							2.84
	65	338.15	2.42322																																							2.25
	95	368.15	2.05884																																							2.05
	15	288.15	3.6163
	35	308.15	3.22749
	65	338.15	2.73051																																								2.58
	95	368.15	2.31452																																								2.1
	15	288.15	4.00295
	35	308.15	3.56808
	65	338.15	3.01222																																									2.9
	95	368.15	2.54696																																									2.47
	15	288.15	5.26445
	35	308.15	4.71114
	65	338.15	4.00391
	95	368.15	3.41194																																										3.42
	15	288.15	2.02966																																											2.1
	35	308.15	1.82391																																											1.84
	65	338.15	1.56091
	95	368.15	1.34078
	15	288.15	2.60216																																												2.74
	35	308.15	2.32223																																												2.33
	65	338.15	1.96442																																												1.89
	95	368.15	1.66493
	15	288.15	2.3665																																													2.29
	35	308.15	2.10518																																													1.89
	65	338.15	1.77116
	95	368.15	1.49158
	15	288.15	3.52305
	35	308.15	3.13776																																														3.04
	65	338.15	2.64527																																														2.44
	95	368.15	2.23304																																														2.04
	15	288.15	4.27435
	35	308.15	3.7985
	65	338.15	3.19026
	95	368.15	2.68116
	15	288.15	2.28349
	35	308.15	2.03932
	65	338.15	1.72722
	95	368.15	1.46598
	15	288.15	3.43969
	35	308.15	3.09546
	65	338.15	2.65546
	95	368.15	2.28718
	15	288.15	4.66938
	35	308.15	4.20079
	65	338.15	3.60183
	95	368.15	3.10048
	15	288.15	6.49422
	35	308.15	5.84439
	65	338.15	5.01377
	95	368.15	4.31853
	15	288.15	4.21172
	35	308.15	3.78161
	65	338.15	3.23183
	95	368.15	2.77166
	15	288.15	2.99909
	35	308.15	2.70252
	65	338.15	2.32344
	95	368.15	2.00614
	15	288.15	3.41982
	35	308.15	3.07476
	65	338.15	2.6337
	95	368.15	2.26453
	15	288.15	3.76319
	35	308.15	3.37607
	65	338.15	2.88124
	95	368.15	2.46705
	15	288.15	4.10586
	35	308.15	3.67671
	65	338.15	3.12818
	95	368.15	2.66904
	15	288.15	4.5152
	35	308.15	4.03747
	65	338.15	3.42683
	95	368.15	2.91571
	15	288.15	4.90824
	35	308.15	4.38399
	65	338.15	3.7139
	95	368.15	3.15301
	15	288.15	5.27789
	35	308.15	4.7097
	65	338.15	3.98343
	95	368.15	3.37554
	15	288.15	4.03516
	35	308.15	3.62157
	65	338.15	3.09292
	95	368.15	2.65043
	15	288.15	4.52773
	35	308.15	4.07188
	65	338.15	3.48921
	95	368.15	3.0015
	15	288.15	5.43697
	35	308.15	4.88183
	65	338.15	4.17226
	95	368.15	3.57833
	15	288.15	5.96272
	35	308.15	5.3498
	65	338.15	4.56635
	95	368.15	3.91059
	15	288.15	6.62431
	35	308.15	5.95
	65	338.15	5.08809
	95	368.15	4.36665
	15	288.15	7.93017
	35	308.15	7.11071
	65	338.15	6.06328
	95	368.15	5.18655
	15	288.15	7.89411
	35	308.15	7.08177
	65	338.15	6.04343
	95	368.15	5.17432
	15	288.15	6.22117
	35	308.15	5.57242
	65	338.15	4.74319
	95	368.15	4.0491
	15	288.15	3.86245
	35	308.15	3.47645
	65	338.15	2.98308
	95	368.15	2.57011
	15	288.15	4.56052
	35	308.15	4.10144
	65	338.15	3.51463
	95	368.15	3.02345
	15	288.15	5.31895
	35	308.15	4.78247
	65	338.15	4.09673
	95	368.15	3.52275
	15	288.15	6.18663
	35	308.15	5.56223
	65	338.15	4.76413
	95	368.15	4.0961
	15	288.15	6.74897
	35	308.15	6.05002
	65	338.15	5.15662
	95	368.15	4.40882
	15	288.15	7.23232
	35	308.15	6.49488
	65	338.15	5.5523
	95	368.15	4.76333
	15	288.15	3.08679
	35	308.15	2.7771
	65	338.15	2.38125
	95	368.15	2.04991
	15	288.15	4.27969
	35	308.15	3.84978
	65	338.15	3.30027
	95	368.15	2.84032
	15	288.15	3.50261
	35	308.15	3.1466
	65	338.15	2.69154
	95	368.15	2.31065
	15	288.15	2.81505
	35	308.15	2.52555
	65	338.15	2.15551
	95	368.15	1.84578
	15	288.15	3.21451
	35	308.15	2.8724
	65	338.15	2.43512
	95	368.15	2.06911
	15	288.15	2.80329
	35	308.15	2.53042
	65	338.15	2.18163
	95	368.15	1.88969
	15	288.15	3.36053
	35	308.15	3.00729
	65	338.15	2.55577
	95	368.15	2.17784
	15	288.15	2.79328
	35	308.15	2.51597
	65	338.15	2.1615
	95	368.15	1.8648
	15	288.15	4.16861
	35	308.15	3.72654
	65	338.15	3.16147
	95	368.15	2.68851
	15	288.15	3.17511
	35	308.15	2.85534
	65	338.15	2.4466
	95	368.15	2.10447
	15	288.15	3.06746
	35	308.15	2.76733
	65	338.15	2.3837
	95	368.15	2.06259
	15	288.15	3.4626
	35	308.15	3.10822
	65	338.15	2.65525
	95	368.15	2.2761
	15	288.15	4.69139
	35	308.15	4.21001
	65	338.15	3.59471
	95	368.15	3.07969
	15	288.15	3.4413
	35	308.15	3.08266
	65	338.15	2.62424
	95	368.15	2.24054
	15	288.15	5.43971
	35	308.15	4.83636
	65	338.15	4.06516
	95	368.15	3.41964
	15	288.15	5.97504
	35	308.15	5.32129
	65	338.15	4.48567
	95	368.15	3.78623
	15	288.15	4.98337
	35	308.15	4.46618
	65	338.15	3.8051
	95	368.15	3.25176
	15	288.15	5.89906
	35	308.15	5.2536
	65	338.15	4.42858
	95	368.15	3.73801
	15	288.15	5.26523
	35	308.15	4.73065
	65	338.15	4.04734
	95	368.15	3.4754
	15	288.15	5.53119
	35	308.15	4.95914
	65	338.15	4.22795
	95	368.15	3.61593
	15	288.15	4.89219
	35	308.15	4.38675
	65	338.15	3.74069
	95	368.15	3.19993
	15	288.15	2.92642
	35	308.15	2.62922
	65	338.15	2.24933
	95	368.15	1.93136
	15	288.15	3.18962
	35	308.15	2.86042
	65	338.15	2.43963
	95	368.15	2.08743
	15	288.15	3.77372
	35	308.15	3.38429
	65	338.15	2.88651
	95	368.15	2.46985
	15	288.15	3.67715
	35	308.15	3.30856
	65	338.15	2.83744
	95	368.15	2.44309
	15	288.15	3.90142
	35	308.15	3.50192
	65	338.15	2.99128
	95	368.15	2.56387
	15	288.15	4.32148
	35	308.15	3.87723
	65	338.15	3.3094
	95	368.15	2.83411
	15	288.15	4.54277
	35	308.15	4.07351
	65	338.15	3.47369
	95	368.15	2.97164
	15	288.15	5.23548
	35	308.15	4.58246
	65	338.15	3.74775
	95	368.15	3.04909
	15	288.15	5.63143
	35	308.15	4.93349
	65	338.15	4.0414
	95	368.15	3.29469
	15	288.15	6.87483
	35	308.15	6.14121
	65	338.15	5.20349
	95	368.15	4.4186
	15	288.15	7.41442
	35	308.15	6.64006
	65	338.15	5.65028
	95	368.15	4.82181
	15	288.15	9.76437
	35	308.15	8.72467
	65	338.15	7.39572
	95	368.15	6.28336
	15	288.15	7.23088
	35	308.15	6.45711
	65	338.15	5.46807
	95	368.15	4.64023
	15	288.15	7.33034
	35	308.15	6.5513
	65	338.15	5.55553
	95	368.15	4.72205
	15	288.15	8.0872
	35	308.15	7.22633
	65	338.15	6.12596
	95	368.15	5.20492
[truncated: 63 more columns]

## Sheet: Park et al. 2010
				n-Butanol	Decane	Undecane	Dodecane	Tetradecane			D (cm)	H (cm)	V (cm3)	m (g)	density (g/m3)
			CAS-RN	71-36-3	124-18-5	1120-21-4	112-40-3	629-59-4			1.16	3.58	3.78345	0.09734	0.0257278
			SMILES	CCCCO	CCCCCCCCCC	CCCCCCCCCCC	CCCCCCCCCCCC	CCCCCCCCCCCCCC
			E	0.22	0	0	0	0
			S	0.42	0	0	0	0
			A	0.37	0	0	0	0
			B	0.48	0	0	0	0
			V	0.7309	1.5176	1.6585	1.7994	2.0812
			L	2.601	4.686	5.191	5.696	6.705
			source of solute descriptors	Abraham Absolv	Abraham Absolv	Abraham Absolv	Abraham Absolv	Abraham Absolv
			Log KPUF/G (15℃) in mLair/gsorbent	3.96295	3.71681	4.11341	4.51	5.30247
			ΔU PUF/G, J/mol	-40078.1	-34479.4	-38454.4	-42429.4	-50375.2
			The density of PUF (g/cm3)	0.0257278
				Original empirical values
				KPUF/G	KPUF/G	KPUF/G	KPUF/G	KPUF/G
		Mean Temperature (℃)	Mean Temperature (K)	n-Butanol	Decane	Undecane	Dodecane	Tetradecane
		23	296.15	107.3	71.3	486.1	1378.2	5395.1
			Predicted values	Empirical Log (KPUF/G / ml/g) values
			Log (KPUF/G / ml/g)	Log (KPUF/G / ml/g)	Log (KPUF/G / ml/g)	Log (KPUF/G / ml/g)	Log (KPUF/G / ml/g)	Log (KPUF/G / ml/g)
	Mean Temperature (℃)	Mean Temperature (K)		n-Butanol	Decane	Undecane	Dodecane	Tetradecane
	23	296.15	3.76669	3.6202
		296.15	3.54796		3.44269
		296.15	3.92509			4.27632
		296.15	4.30222				4.72891
		296.15	5.05578					5.3216

## Sheet: Bidleman et al. 2016
						hexachlorobenzene	alpha-hexachlorocyclohexane	2,4-dibromoanisole	2,4,6-tribromoanisole
					CAS-RN	118-74-1	319-84-6	21702-84-1	607-99-8
					SMILES	Clc1c(Cl)c(Cl)c(c(c1Cl)Cl)Cl	Cl[C@@H]1[C@H](Cl)[C@@H](Cl)[C@H]([C@@H]([C@H]1Cl)Cl)Cl	COC1=C(C=C(C=C1)Br)Br	COc1c(Br)cc(cc1Br)Br
					E	1.49	1.45	1.28	1.55
					S	0.99	1.2	0.85	1.12
					A	0	0	0	0
					B	0	0.47	0.25	0.21
					V	1.4508	1.5798	1.266	1.441
					L	7.39	7.34	6.182	7.085
					source of solute descriptors	Sprunger, L., Proctor, A., Acree, W. E., Abraham, M. H. (2007) J. Chromatogr. A, 1175, 162-173.	Goss, Arp, Bronner, Niederer , JCED 2008	predicted using UFZ LSER website	LSER Dataset for CompTox users (2017)
					Log KPUF/G (15℃) in mLair/gsorbent	7.23232	7.57395	6.09654	7.22502
					ΔU PUF/G, J/mol	-62675.6	-67807.8	-52651.7	-63526.6
					Predicted values	Original empirical values
					Log (KPUF/G / ml/g)	Log (KPUF/G / ml/g)	Log (KPUF/G / ml/g)	Log (KPUF/G / ml/g)	Log (KPUF/G / ml/g)
	Max Temperature (℃)	Min Temperature (℃)	Mean Temperature (℃)	Mean Temperature (K)		hexachlorobenzene	alpha-hexachlorocyclohexane	2,4-dibromoanisole	2,4,6-tribromoanisole
	7.9	3.9	5.3	278.45	7.62812	7.55
	15	3.8	9.7	282.85	7.44521	7.63
	16.6	11.1	13.6	286.75	7.28779	7.44
	22.6	12.4	17.5	290.65	7.13459	7.24
	21.6	14.1	17.2	290.35	7.14623	7.35
	17.4	10.3	14.3	287.45	7.25998	7.33
	9	0.8	4	277.15	7.68327	7.8
	4.5	-0.1	1.9	275.05	7.77346	7.77
	13.8	-0.5	4.6	277.75	7.65775	7.64
			17.5	290.65	7.46821		7.88
			17.2	290.35	7.48081		7.95
			14.3	287.45	7.60388		8.42
			5.3	278.45	6.42904			7.42
			9.7	282.85	6.27539			6.9
			13.6	286.75	6.14314			7.28
			17.5	290.65	6.01444			7.39
			17.2	290.35	6.02422			7.18
			14.3	287.45	6.11978			7.12
			4	277.15	6.47537			7.64
			1.9	275.05	6.55114			7.82
			4.6	277.75	6.45393			7.57
			5.3	278.45	7.6262				7.71
			9.7	282.85	7.44081				7.51
			13.6	286.75	7.28125				7.35
			17.5	290.65	7.12596				6.99
			17.2	290.35	7.13776				7.11
			14.3	287.45	7.25306				7.6
			4	277.15	7.6821				7.86
			1.9	275.05	7.77351				7.86
			4.6	277.75	7.65623				7.66

## Sheet: Parnis et al. 2016
				Naphthalene	Acenaphthylene	Acenaphthene	Fluorene	Phenanthrene	Anthracene	Fluoranthene	Pyrene	Dibenzothiophene	TOTAL-C1-Naphthalenes	TOTAL-C2-Napthalenes	TOTAL-C3-Naphthalenes	TOTAL-C1-Fluorenes	TOTAL-C2-Fluorenes	TOTAL-C3-Fluroenes	TOTAL-C4-Fluorenes	TOTAL-C1-Phenanthrenes/Anthracenes	TOTAL-C2-Phenanthrenes/Anthracenes	TOTAL-C3-Phenanthrenes/Anthracenes	TOTAL-C4-Phenanthrenes/Anthracenes	Retene	Naphthalene-1-methyl	Naphthalene-2-methyl	Naphthalene-1,5-dimethyl	Naphthalene-2-ethyl-6-methyl	Naphthalene-1,2,4-trimethyl	Naphthalene-Isopropyl-1-methyl (eudalene)	Naphthalene-1,2,5,6-tetramethyl	Fluorene-9-methyl	Fluorene-1,7-dimethyl	Fluorene-9-n-butyl	Phenanthrene-9-methyl	Phenanthrene-1-methyl	Anthracene-1-methyl	Phenanthrene-3,6-dimethyl	Phenanthrene-1,3-dimethyl	Anthracene-2,3-dimethyl	Phenanthrene-9-n-propyl	Phenanthrene-1,2,6,9-tetramethyl	Fluoranthene-2-methyl	Dibenzothiophene-2-methyl	Dibenzothiophene-2,8-dimethyl	Dibenzothiophene-2,4,7-trimethyl	Dibenzothiophene-4,6-diethyl
			CAS-RN	91-20-3	208-96-8	83-32-9	86-73-7	85-01-8	120-12-7	206-44-0	129-00-0	132-65-0	N/A	N/A	N/A	N/A	N/A	N/A	N/A	N/A	N/A	N/A	N/A	483-65-8	90-12-0	91-57-6	571-61-9	7372-86-3	2717-42-2	490-65-3	2131-43-3	2523-37-7	442-66-0	3952-42-9	883-20-5	832-69-9	610-48-0	1576-67-6	16664-45-2	613-06-9	17024-03-2	204256-39-3	CC1=CC2=C3C(=CC=C2)C4=CC=CC=C4C3=C1	20928-02-3	1207-15-4	216983-03-8	132034-91-4
			SMILES	c1ccc2c(c1)cccc2	c1cc2cccc3c2c(c1)C=C3	c1cc2cccc3c2c(c1)CC3	c1ccc2c(c1)Cc1c2cccc1	c1ccc2c(c1)c1ccccc1cc2	c1ccc2c(c1)cc1c(c2)cccc1	c1ccc2c(c1)c1cccc3c1c2ccc3	c1cc2ccc3c4c2c(c1)ccc4ccc3	c1ccc2c(c1)sc1c2cccc1	N/A	N/A	N/A	N/A	N/A	N/A	N/A	N/A	N/A	N/A	N/A	CC1=C2C=CC3=C(C2=CC=C1)C=CC(=C3)C(C)C	Cc1cccc2c1cccc2	Cc1ccc2c(c1)cccc2	Cc1cccc2c1cccc2C	CCC1=CC2=C(C=C1)C=C(C=C2)C	Cc1cc(C)c(c2c1cccc2)C	CC1=C2C=C(C=CC2=CC=C1)C(C)C	Cc1c(C)ccc2c1ccc(c2C)C	CC1C2=CC=CC=C2C3=CC=CC=C13	CC1=CC2=C(C=C1)C3=CC=CC(=C3C2)C	CCCCC1C2=CC=CC=C2C3=CC=CC=C13	Cc1cc2ccccc2c2c1cccc2	Cc1cccc2c1ccc1c2cccc1	Cc1cccc2c1cc1ccccc1c2	Cc1ccc2c(c1)c1cc(C)ccc1cc2	CC1=CC(=C2C=CC3=CC=CC=C3C2=C1)C	CC1=CC2=CC3=CC=CC=C3C=C2C=C1C	CCCC1=CC2=CC=CC=C2C3=CC=CC=C31	CC1=CC2=C(C=C1)C(=CC3=C2C=CC(=C3C)C)C	30997-39-8	Cc1ccc2c(c1)c1ccccc1s2	Cc1ccc2c(c1)c1cc(C)ccc1s2	Cc1ccc2c(c1)sc1c2cc(cc1C)C	CCc1cccc2c1sc1c2cccc1CC
			E	1.34	1.75	1.6	1.59	2.06	2.29	2.38	2.81	1.96	N/A	N/A	N/A	N/A	N/A	N/A	N/A	N/A	N/A	N/A	N/A	2.05	1.34	1.3	1.4	1.35	1.5	1.35	1.59	1.59	1.49	1.42	2.06	2.06	2.29	2.05	2.04	2.32	2.1	2.12	2.3	1.95	1.96	1.96	1.96
			S	0.92	1.14	1.05	1.06	1.29	1.34	1.55	1.71	1.2	N/A	N/A	N/A	N/A	N/A	N/A	N/A	N/A	N/A	N/A	N/A	1.19	0.94	0.81	1.05	0.87	1.19	0.87	1.14	1.03	1.37	1.16	1.25	1.25	1.3	1.29	1.27	1.27	1.18	1.29	1.54	1.18	1.18	1.18	1.18
			A	0	0	0	0	0	0	0	0	0	N/A	N/A	N/A	N/A	N/A	N/A	N/A	N/A	N/A	N/A	N/A	0	0	0	0	0	0	0	0	0	0	0	0	0	0	0	0	0	0	0	0	0	0	0	0
			B	0.2	0.26	0.22	0.25	0.26	0.28	0.24	0.28	0.2	N/A	N/A	N/A	N/A	N/A	N/A	N/A	N/A	N/A	N/A	N/A	0.36	0.22	0.25	0.18	0.24	0.19	0.31	0.22	0.25	0.44	0.49	0.29	0.29	0.3	0.29	0.28	0.34	0.27	0.36	0.35	0.2	0.21	0.22	0.22
			V	1.0854	1.2156	1.2586	1.3565	1.4544	1.4544	1.5846	1.5846	1.3791	N/A	N/A	N/A	N/A	N/A	N/A	N/A	N/A	N/A	N/A	N/A	2.018	1.2263	1.2263	1.3672	1.5081	1.5081	1.649	1.649	1.4974	1.6383	1.9201	1.5953	1.5953	1.5953	1.7362	1.7362	1.7362	1.8771	2.018	1.7255	1.52	1.6609	1.8018	1.9427
			L	5.161	6.175	6.469	6.922	7.632	7.568	8.827	8.833	7.588	N/A	N/A	N/A	N/A	N/A	N/A	N/A	N/A	N/A	N/A	N/A	9.491	5.802	5.617	6.545	6.742	7.322	7.017	7.957	7.09	8.091	7.523	8.392	8.408	8.332	8.7	8.714	8.794	9.301	10.058	8.883	7.971	8.245	8.579	8.678
			source of solute descriptors	Sprunger, L., Proctor, A., Acree, W. E., Abraham, M. H. (2007) J. Chromatogr. A, 1175, 162-173.	LSER Dataset for CompTox users (2017)	Sprunger, L., Proctor, A., Acree, W. E., Abraham, M. H. (2007) J. Chromatogr. A, 1175, 162-173.	Sprunger, L., Proctor, A., Acree, W. E., Abraham, M. H. (2007) J. Chromatogr. A, 1175, 162-173.	Sprunger, L., Proctor, A., Acree, W. E., Abraham, M. H. (2007) J. Chromatogr. A, 1175, 162-173.	Sprunger, L., Proctor, A., Acree, W. E., Abraham, M. H. (2007) J. Chromatogr. A, 1175, 162-173.	Sprunger, L., Proctor, A., Acree, W. E., Abraham, M. H. (2007) J. Chromatogr. A, 1175, 162-173.	Sprunger, L., Proctor, A., Acree, W. E., Abraham, M. H. (2007) J. Chromatogr. A, 1175, 162-173.	LSER Dataset for CompTox users (2017)	N/A	N/A	N/A	N/A	N/A	N/A	N/A	N/A	N/A	N/A	N/A	Calculated	Sprunger, L., Proctor, A., Acree, W. E., Abraham, M. H. (2007) J. Chromatogr. A, 1175, 162-173.	Sprunger, L., Proctor, A., Acree, W. E., Abraham, M. H. (2007) J. Chromatogr. A, 1175, 162-173.	LSER Dataset for CompTox users (2017)	Calculated	LSER Dataset for CompTox users (2017)	Calculated	LSER Dataset for CompTox users (2017)	LSER Dataset for CompTox users (2017)	Calculated	Calculated	LSER Dataset for CompTox users (2017)	LSER Dataset for CompTox users (2017)	LSER Dataset for CompTox users (2017)	LSER Dataset for CompTox users (2017)	Calculated	Calculated	Calculated	Calculated	Calculated	LSER Dataset for CompTox users (2017)	LSER Dataset for CompTox users (2017)	LSER Dataset for CompTox users (2017)	LSER Dataset for CompTox users (2017)
			Log KPUF/G (15℃) in mLair/gsorbent	5.43697	6.55066	6.62431	6.98867	7.89411	7.93017	9.20151	9.46657	7.69584	5.7911	6.16876	6.57136	7.4741	8.21146	7.39218	7.90419	8.4233	8.72619	9.22043	8.85721	9.20317	5.96272	5.61947	6.70759	6.59211	7.52551	6.8254	7.9329	7.0971	8.40005	7.73056	8.40655	8.41791	8.44545	8.72847	8.70581	8.76261	9.01393	9.76874	9.26301	7.97321	8.20579	8.48098	8.58931
			ΔU PUF/G, J/mol	-47181.7	-57080.5	-57311.1	-60688.1	-69042.2	-69647	-80423.3	-83265.1	-66305.2	-50551.8	-54238.3	-58327	-65896.7	-72940.2	-69087.8	-74109.6	-73640	-77169.9	-81227.5	-79215.3	-82490	-52093.6	-49010.1	-59028	-58510.6	-66636.6	-61496.6	-70290.6	-62686	-74777.9	-72246.5	-73409.8	-73478.6	-74031.8	-77241.7	-76949.9	-77293.9	-79693.5	-86688.1	-82291.6	-69403.6	-72385.3	-75625.1	-77854.3
			The density of PUF (g/cm3)	0.022
				Original empirical values
				Log KPUF/G	Log KPUF/G	Log KPUF/G	Log KPUF/G	Log KPUF/G	Log KPUF/G	Log KPUF/G	Log KPUF/G	Log KPUF/G	Log KPUF/G	Log KPUF/G	Log KPUF/G	Log KPUF/G	Log KPUF/G	Log KPUF/G	Log KPUF/G	Log KPUF/G	Log KPUF/G	Log KPUF/G	Log KPUF/G	Log KPUF/G	Log KPUF/G	Log KPUF/G	Log KPUF/G	Log KPUF/G	Log KPUF/G	Log KPUF/G	Log KPUF/G	Log KPUF/G	Log KPUF/G	Log KPUF/G	Log KPUF/G	Log KPUF/G	Log KPUF/G	Log KPUF/G	Log KPUF/G	Log KPUF/G	Log KPUF/G	Log KPUF/G	Log KPUF/G	Log KPUF/G	Log KPUF/G	Log KPUF/G	Log KPUF/G
		Mean Temperature (℃)	Mean Temperature (K)	Naphthalene	Acenaphthylene	Acenaphthene	Fluorene	Phenanthrene	Anthracene	Fluoranthene	Pyrene	Dibenzothiophene	TOTAL-C1-Naphthalenes	TOTAL-C2-Napthalenes	TOTAL-C3-Naphthalenes	TOTAL-C1-Fluorenes	TOTAL-C2-Fluorenes	TOTAL-C3-Fluroenes	TOTAL-C4-Fluorenes	TOTAL-C1-Phenanthrenes/Anthracenes	TOTAL-C2-Phenanthrenes/Anthracenes	TOTAL-C3-Phenanthrenes/Anthracenes	TOTAL-C4-Phenanthrenes/Anthracenes	Retene	Naphthalene-1-methyl	Naphthalene-2-methyl	Naphthalene-1,5-dimethyl	Naphthalene-2-ethyl-6-methyl	Naphthalene-1,2,4-trimethyl	Naphthalene-Isopropyl-1-methyl (eudalene)	Naphthalene-1,2,5,6-tetramethyl	Fluorene-9-methyl	Fluorene-1,7-dimethyl	Fluorene-9-n-butyl	Phenanthrene-9-methyl	Phenanthrene-1-methyl	Anthracene-1-methyl	Phenanthrene-3,6-dimethyl	Phenanthrene-1,3-dimethyl	Anthracene-2,3-dimethyl	Phenanthrene-9-n-propyl	Phenanthrene-1,2,6,9-tetramethyl	Fluoranthene-2-methyl	Dibenzothiophene-2-methyl	Dibenzothiophene-2,8-dimethyl	Dibenzothiophene-2,4,7-trimethyl	Dibenzothiophene-4,6-diethyl
		22	295.15	4.99	5.79	5.38	5.9	6.51	6.97	7.5	7.49	6.69	4.92	5.14	5.51	5.96	6.74	6.45	6.67	6.28	6.38	7.91	8.03	7.99	5.19	5.23	5.25	5.52	5.64	5.51	6.26	5.93	6.9	6.81	7.29	7.29	7.46	7.41	7.4	7.47	7.68	8.51	8.61	7.23	7.68	7.89	7.78
			Predicted values	Experimental Log (KPUF/G / ml/g) values
			Log (KPUF/G / ml/g)	Log (KPUF/G / ml/g)	Log (KPUF/G / ml/g)	Log (KPUF/G / ml/g)	Log (KPUF/G / ml/g)	Log (KPUF/G / ml/g)	Log (KPUF/G / ml/g)	Log (KPUF/G / ml/g)	Log (KPUF/G / ml/g)	Log (KPUF/G / ml/g)	Log (KPUF/G / ml/g)	Log (KPUF/G / ml/g)	Log (KPUF/G / ml/g)	Log (KPUF/G / ml/g)	Log (KPUF/G / ml/g)	Log (KPUF/G / ml/g)	Log (KPUF/G / ml/g)	Log (KPUF/G / ml/g)	Log (KPUF/G / ml/g)	Log (KPUF/G / ml/g)	Log (KPUF/G / ml/g)	Log (KPUF/G / ml/g)	Log (KPUF/G / ml/g)	Log (KPUF/G / ml/g)	Log (KPUF/G / ml/g)	Log (KPUF/G / ml/g)	Log (KPUF/G / ml/g)	Log (KPUF/G / ml/g)	Log (KPUF/G / ml/g)	Log (KPUF/G / ml/g)	Log (KPUF/G / ml/g)	Log (KPUF/G / ml/g)	Log (KPUF/G / ml/g)	Log (KPUF/G / ml/g)	Log (KPUF/G / ml/g)	Log (KPUF/G / ml/g)	Log (KPUF/G / ml/g)	Log (KPUF/G / ml/g)	Log (KPUF/G / ml/g)	Log (KPUF/G / ml/g)	Log (KPUF/G / ml/g)	Log (KPUF/G / ml/g)	Log (KPUF/G / ml/g)	Log (KPUF/G / ml/g)	Log (KPUF/G / ml/g)
	Mean Temperature (℃)	Mean Temperature (K)		Naphthalene	Acenaphthylene	Acenaphthene	Fluorene	Phenanthrene	Anthracene	Fluoranthene	Pyrene	Dibenzothiophene	TOTAL-C1-Naphthalenes	TOTAL-C2-Napthalenes	TOTAL-C3-Naphthalenes	TOTAL-C1-Fluorenes	TOTAL-C2-Fluorenes	TOTAL-C3-Fluroenes	TOTAL-C4-Fluorenes	TOTAL-C1-Phenanthrenes/Anthracenes	TOTAL-C2-Phenanthrenes/Anthracenes	TOTAL-C3-Phenanthrenes/Anthracenes	TOTAL-C4-Phenanthrenes/Anthracenes	Retene	Naphthalene-1-methyl	Naphthalene-2-methyl	Naphthalene-1,5-dimethyl	Naphthalene-2-ethyl-6-methyl	Naphthalene-1,2,4-trimethyl	Naphthalene-Isopropyl-1-methyl (eudalene)	Naphthalene-1,2,5,6-tetramethyl	Fluorene-9-methyl	Fluorene-1,7-dimethyl	Fluorene-9-n-butyl	Phenanthrene-9-methyl	Phenanthrene-1-methyl	Anthracene-1-methyl	Phenanthrene-3,6-dimethyl	Phenanthrene-1,3-dimethyl	Anthracene-2,3-dimethyl	Phenanthrene-9-n-propyl	Phenanthrene-1,2,6,9-tetramethyl	Fluoranthene-2-methyl	Dibenzothiophene-2-methyl	Dibenzothiophene-2,8-dimethyl	Dibenzothiophene-2,4,7-trimethyl	Dibenzothiophene-4,6-diethyl
	22	295.15	5.23411	6.64758
		295.15	6.30525		7.44758
		295.15	6.37791			7.03758
		295.15	6.72775				7.55758
		295.15	7.59727					8.16758
		295.15	7.63073						8.62758
		295.15	8.85574							9.15758
		295.15	9.10858								9.14758
		295.15	7.41076									8.34758
		295.15	5.57375										6.57758
		295.15	5.93557											6.79758
		295.15	6.32059												7.16758
		295.15	7.19078													7.61758
		295.15	7.89786														8.39758
		295.15	7.09514															8.10758
		295.15	7.58556																8.32758
		295.15	8.10669																	7.93758
		295.15	8.3944																		8.03758
		295.15	8.8712																			9.56758
		295.15	8.51663																				9.68758
		295.15	8.84851																					9.64758
		295.15	5.73875																						6.84758
		295.15	5.40876																							6.88758
		295.15	6.45381																								6.90758
		295.15	6.34054																									7.17758
		295.15	7.23901																										7.29758
		295.15	6.561																											7.16758
		295.15	7.63069																												7.91758
		295.15	6.82758																													7.58758
		295.15	8.07855																														8.55758
		295.15	7.41994																															8.46758
		295.15	8.09093																																8.94758
		295.15	8.102																																	8.94758
		295.15	8.12716																																		9.11758
		295.15	8.39638																																			9.06758
		295.15	8.37497																																				9.05758
		295.15	8.43029																																					9.12758
		295.15	8.67129																																						9.33758
		295.15	9.39603																																							10.1676
		295.15	8.90921																																								10.2676
		295.15	7.67481																																									8.88758
		295.15	7.89458																																										9.33758
		295.15	8.15583																																											9.54758
		295.15	8.25458																																												9.43758

## Sheet: Francisco et al. 2017
				hexachlorobenzene	alphahexachlorocyclohexane	Acenaphthylene	Acenaphthene	Fluorene	Phenanthrene	Anthracene	Benzo(a)anthracene	Fluoranthene	Pyrene	Dibenzothiophene	Naphthalene-1,5-dimethyl	Naphthalene-2-ethyl-6-methyl	Naphthalene-1,2,4-trimethyl	Naphthalene-Isopropyl-1-methyl (eudalene)	Naphthalene-1,2,5,6-tetramethyl	Fluorene-9-methyl	Fluorene-9-ethyl	Fluorene-1,7-dimethyl	Fluorene-9-n-butyl	Fluorene-9-n-propyl	(13C6) Pentachlorobenzene	gamma-Hexachlorocyclohexane	Chrysene
			CAS-RN	118-74-1	319-84-6	208-96-8	83-32-9	86-73-7	85-01-8	120-12-7	56-55-3	206-44-0	129-00-0	132-65-0	571-61-9	7372-86-3	2717-42-2	490-65-3	2131-43-3	2523-37-7	2294-82-8	442-66-0	3952-42-9	158599-21-4	608-93-5	58-89-9	218-01-9
			SMILES	Clc1c(Cl)c(Cl)c(c(c1Cl)Cl)Cl	Cl[C@@H]1[C@H](Cl)[C@@H](Cl)[C@H]([C@@H]([C@H]1Cl)Cl)Cl	c1cc2cccc3c2c(c1)C=C3	c1cc2cccc3c2c(c1)CC3	c1ccc2c(c1)Cc1c2cccc1	c1ccc2c(c1)c1ccccc1cc2	c1ccc2c(c1)cc1c(c2)cccc1	c1ccc2c(c1)cc1c(c2)ccc2c1cccc2	c1ccc2c(c1)c1cccc3c1c2ccc3	c1cc2ccc3c4c2c(c1)ccc4ccc3	c1ccc2c(c1)sc1c2cccc1	Cc1cccc2c1cccc2C	CCC1=CC2=C(C=C1)C=C(C=C2)C	Cc1cc(C)c(c2c1cccc2)C	CC1=C2C=C(C=CC2=CC=C1)C(C)C	Cc1c(C)ccc2c1ccc(c2C)C	CC1C2=CC=CC=C2C3=CC=CC=C13	CCC1C2=CC=CC=C2C3=CC=CC=C13	CC1=CC2=C(C=C1)C3=CC=CC(=C3C2)C	CCCCC1C2=CC=CC=C2C3=CC=CC=C13	CCCC1C2=CC=CC=C2C3=CC=CC=C13	Clc1cc(Cl)c(c(c1Cl)Cl)Cl	Cl[C@@H]1[C@H](Cl)[C@@H](Cl)[C@@H]([C@@H]([C@H]1Cl)Cl)Cl	c1ccc2c(c1)c1ccc3c(c1cc2)cccc3
			E	1.49	1.45	1.75	1.6	1.59	2.06	2.29	2.99	2.38	2.81	1.96	1.4	1.35	1.5	1.35	1.59	1.59	1.42	1.49	1.42	1.42	1.33	1.45	3.03
			S	0.99	1.2	1.14	1.05	1.06	1.29	1.34	1.7	1.55	1.71	1.2	1.05	0.87	1.19	0.87	1.14	1.03	1.16	1.37	1.16	1.16	0.92	1.28	1.73
			A	0	0	0	0	0	0	0	0	0	0	0	0	0	0	0	0	0	0	0	0	0	0.06	0	0
			B	0	0.47	0.26	0.22	0.25	0.26	0.28	0.35	0.24	0.28	0.2	0.18	0.24	0.19	0.31	0.22	0.25	0.49	0.44	0.49	0.49	0	0.5	0.33
			V	1.4508	1.5798	1.2156	1.2586	1.3565	1.4544	1.4544	1.8234	1.5846	1.5846	1.3791	1.3672	1.5081	1.5081	1.649	1.649	1.4974	1.6383	1.6383	1.9201	1.7792	1.3284	1.5798	1.8234
			L	7.39	7.34	6.175	6.469	6.922	7.632	7.568	10.291	8.827	8.833	7.588	6.545	6.742	7.322	7.017	7.957	7.09	6.578	8.091	7.523	7.05	6.63	7.57	10.334
			source of solute descriptors	Sprunger, L., Proctor, A., Acree, W. E., Abraham, M. H. (2007) J. Chromatogr. A, 1175, 162-173.	Goss, Arp, Bronner, Niederer , JCED 2008	LSER Dataset for CompTox users (2017)	Sprunger, L., Proctor, A., Acree, W. E., Abraham, M. H. (2007) J. Chromatogr. A, 1175, 162-173.	Sprunger, L., Proctor, A., Acree, W. E., Abraham, M. H. (2007) J. Chromatogr. A, 1175, 162-173.	Sprunger, L., Proctor, A., Acree, W. E., Abraham, M. H. (2007) J. Chromatogr. A, 1175, 162-173.	Sprunger, L., Proctor, A., Acree, W. E., Abraham, M. H. (2007) J. Chromatogr. A, 1175, 162-173.	LSER Dataset for CompTox users (2017)	Sprunger, L., Proctor, A., Acree, W. E., Abraham, M. H. (2007) J. Chromatogr. A, 1175, 162-173.	Sprunger, L., Proctor, A., Acree, W. E., Abraham, M. H. (2007) J. Chromatogr. A, 1175, 162-173.	LSER Dataset for CompTox users (2017)	LSER Dataset for CompTox users (2017)	Calculated	LSER Dataset for CompTox users (2017)	Calculated	LSER Dataset for CompTox users (2017)	LSER Dataset for CompTox users (2017)	Calculated	Calculated	Calculated	Calculated	Abraham, M. H., Ibrahim, A., Acree, Jr. W. E. (2007) Fluid Phase Eq., 251, 93.	Goss, Arp, Bronner, Niederer JCED 2008	Sprunger, L., Proctor, A., Acree, W. E., Abraham, M. H. (2007) J. Chromatogr. A, 1175, 162-173.
			Log KPUF/G (15℃) in mLair/gsorbent	7.23232	7.57395	6.55066	6.62431	6.98867	7.89411	7.93017	10.5499	9.20151	9.46657	7.69584	6.70759	6.59211	7.52551	6.8254	7.9329	7.0971	6.98352	8.40005	7.73056	7.35668	6.74897	7.86765	10.6294
			ΔU PUF/G, J/mol	-62675.6	-67807.8	-57080.5	-57311.1	-60688.1	-69042.2	-69647	-92415.1	-80423.3	-83265.1	-66305.2	-59028	-58510.6	-66636.6	-61496.6	-70290.6	-62686	-64576	-74777.9	-72246.5	-68409.1	-59404.8	-70204.8	-93128
			The density of PUF (g/cm3)	0.022
				Original empirical values
				KPUF/G	KPUF/G	KPUF/G	KPUF/G	KPUF/G	KPUF/G	KPUF/G	KPUF/G	KPUF/G	KPUF/G	KPUF/G	KPUF/G	KPUF/G	KPUF/G	KPUF/G	KPUF/G	KPUF/G	KPUF/G	KPUF/G	KPUF/G	KPUF/G	KPUF/G	KPUF/G	KPUF/G
		Mean Temperature (℃)	Mean Temperature (K)	hexachlorobenzene	alphahexachlorocyclohexane	Acenaphthylene	Acenaphthene	Fluorene	Phenanthrene	Anthracene	Benzo(a)anthracene	Fluoranthene	Pyrene	Dibenzothiophene	Naphthalene-1,5-dimethyl	Naphthalene-2-ethyl-6-methyl	Naphthalene-1,2,4-trimethyl	Naphthalene-Isopropyl-1-methyl (eudalene)	Naphthalene-1,2,5,6-tetramethyl	Fluorene-9-methyl	Fluorene-9-ethyl	Fluorene-1,7-dimethyl	Fluorene-9-n-butyl	Fluorene-9-n-propyl	(13C6) Pentachlorobenzene	gamma-Hexachlorocyclohexane	Chrysene
		5	278.15	2330000	66400000	1610000	1110000	4990000	14800000	53200000	142000000	48500000	30000000	94100000	520000	1610000	2520000	1900000	10700000	5420000	7410000	35200000	39000000	14800000	877000	154000000	4.81e+08
		20	293.15	220000	5540000	300000	168000	748000	1670000	8010000	28200000	12600000	1.37e+07	17600000	69900	219000	324000	233000	1470000	827000	914000	3880000	3430000	1890000	146000	14300000	65900000
		35	308.15	92300	2400000	82900	49000	159000	346000	950000	4.02e+06	2410000	1310000	2400000	25400	66200	10700	77300	503000	169000	218000	1290000	920000	420000	39500	5820000	10100000
			Predicted values	Empiricall Log (KPUF/G / ml/g) values
			Log (KPUF/G / ml/g)	Log (KPUF/G / ml/g)	Log (KPUF/G / ml/g)	Log (KPUF/G / ml/g)	Log (KPUF/G / ml/g)	Log (KPUF/G / ml/g)	Log (KPUF/G / ml/g)	Log (KPUF/G / ml/g)	Log (KPUF/G / ml/g)	Log (KPUF/G / ml/g)	Log (KPUF/G / ml/g)	Log (KPUF/G / ml/g)	Log (KPUF/G / ml/g)	Log (KPUF/G / ml/g)	Log (KPUF/G / ml/g)	Log (KPUF/G / ml/g)	Log (KPUF/G / ml/g)	Log (KPUF/G / ml/g)	Log (KPUF/G / ml/g)	Log (KPUF/G / ml/g)	Log (KPUF/G / ml/g)	Log (KPUF/G / ml/g)	Log (KPUF/G / ml/g)	Log (KPUF/G / ml/g)	Log (KPUF/G / ml/g)
	Mean Temperature (℃)	Mean Temperature (K)		hexachlorobenzene	alphahexachlorocyclohexane	Acenaphthylene	Acenaphthene	Fluorene	Phenanthrene	Anthracene	Benzo(a)anthracene	Fluoranthene	Pyrene	Dibenzothiophene	Naphthalene-1,5-dimethyl	Naphthalene-2-ethyl-6-methyl	Naphthalene-1,2,4-trimethyl	Naphthalene-Isopropyl-1-methyl (eudalene)	Naphthalene-1,2,5,6-tetramethyl	Fluorene-9-methyl	Fluorene-9-ethyl	Fluorene-1,7-dimethyl	Fluorene-9-n-butyl	Fluorene-9-n-propyl	(13C6) Pentachlorobenzene	gamma-Hexachlorocyclohexane	Chrysene
	5	278.15	7.6408	8.02493
	20	293.15	7.03852	7
	35	308.15	6.49488	6.62278
		278.15	8.01588		9.47975
		293.15	7.36429		8.40109
		308.15	6.77613		8.03779
		278.15	6.92268			7.8644
		293.15	6.37417			7.1347
		308.15	5.87906			6.57613
		278.15	6.99783				7.7029
		293.15	6.44711				6.88289
		308.15	5.95				6.34777
		278.15	7.38421					8.35568
		293.15	6.80103					7.53148
		308.15	6.27463					6.85897
		278.15	8.34409						8.82784
		293.15	7.68063						7.88029
		308.15	7.08177						7.19665
		278.15	8.38409							9.38349
		293.15	7.71482							8.56121
		308.15	7.11071							7.6353
		278.15	11.1522								9.80987
		293.15	10.2642								9.10783
		308.15	9.46258								8.2618
		278.15	9.72567									9.34332
		293.15	8.95285									8.75795
		308.15	8.25526									8.03959
		278.15	10.0092										9.1347
		293.15	9.20912										8.7943
		308.15	8.48689										7.77485
		278.15	8.12798											9.63117
		293.15	7.49082											8.90309
		308.15	6.9157											8.03779
		278.15	7.0923												7.37358
		293.15	6.52508												6.50205
		308.15	6.01308												6.06241
		278.15	6.97345													7.8644
		293.15	6.41119													6.99802
		308.15	5.90368													6.47844
		278.15	7.95981														8.05898
		293.15	7.31947														7.16812
		308.15	6.74147														5.68696
		278.15	7.2262															7.93633
		293.15	6.63525															7.02493
		308.15	6.10184															6.54576
		278.15	8.39101																8.68696
		293.15	7.71556																7.82489
		308.15	7.10587																7.35915
		278.15	7.50565																	8.39158
		293.15	6.90327																	7.57508
		308.15	6.35954																	6.88546
		278.15	7.40439																		8.5274
		293.15	6.78385																		7.61852
		308.15	6.22373																		6.99603
		278.15	8.88741																			9.20412
		293.15	8.16884																			8.24641
		308.15	7.52023																			7.76817
		278.15	8.20142																				9.24864
		293.15	7.50717																				8.19287
		308.15	6.88052																				7.62137
		278.15	7.80254																					8.82784
		293.15	7.14516																					7.93404
		308.15	6.55179																					7.28083
		278.15	7.13614																						7.60058
		293.15	6.56529																						6.82193
		308.15	6.05002																						6.25417
		278.15	8.3252																							9.8451
		293.15	7.65057																							8.81291
		308.15	7.04163																							8.4225
		278.15	11.2363																								10.3397
		293.15	10.3414																								9.47646
		308.15	9.53363																								8.6619

## Sheet: Saini et al. 2019
				Tri-methylphosphate	Tri-ethylphosphate	Tri-n-propylphosphate	Tri-n-butylphosphate	Ally-2,4,6-tribromophenylether	2-bromoallyl-2,4,6-tribromophenylether	Pentabromobenzene	Pentabromotoluene	Pentabromoethylbenzene	Hexabromobenzene	Pentachloroanisole
			CAS-RN	512-56-1	78-40-0	513-08-6	126-73-8	3278-89-5	99717-56-3	608-90-2	87-83-2	85-22-3	87-82-1	1825-21-4
			SMILES	COP(=O)(OC)OC	CCOP(=O)(OCC)OCC	CCCOP(=O)(OCCC)OCCC	CCCCOP(=O)(OCCCC)OCCCC	C=CCOc1c(Br)cc(cc1Br)Br		C=C(COc1c(cc(cc1Br)Br)Br)Br	Brc1cc(Br)c(c(c1Br)Br)Br	Brc1c(C)c(Br)c(c(c1Br)Br)Br	CCc1c(Br)c(Br)c(c(c1Br)Br)Br	Brc1c(Br)c(Br)c(c(c1Br)Br)Br	COc1c(Cl)c(Cl)c(c(c1Cl)Cl)Cl
			E	0.11	0	0.06	-0.1	1.66	1.98	2.19	2.25	2.25	2.43	1.42
			S	1.27	1.12	0.88	0.71	1.01	1.16	1.41	1.41	1.36	1.32	1.07
			A	0	0	0	0	0	0	0	0	0	0	0
			B	0.96	1.05	1.19	1.26	0.39	0.28	0	0	0	0	0.04
			V	0.9707	1.3934	1.8161	2.2388	1.6798	1.8548	1.5914	1.7323	1.8732	1.7664	1.528
			L	3.798	5.001	6.278	7.539	8.03	8.999	8.82	9.48	9.848	9.7	7.566
			source of solute descriptors	Abraham, M.H., Acree, W.E. (2013) Sep. Sci. Technol. 48, 884-897	Abraham, M.H., Acree, W.E. (2013) Sep. Sci. Technol. 48, 884-897	Abraham, M. H., Acree, W. E. (2004) New J. Chem., 28, 1538-1543.	Abraham, M. H., Acree, W. E., Leo, A. J., Hoekman, D. (2009) New J. Chem., 33, 1685-1692.	LSER Dataset for CompTox users (2017)	Calculated	LSER Dataset for CompTox users (2017)	LSER Dataset for CompTox users (2017)	LSER Dataset for CompTox users (2017)	LSER Dataset for CompTox users (2017)	LSER Dataset for CompTox users (2017)
			Log KPUF/G (15℃) in mLair/gsorbent	5.00877	5.73253	6.36213	7.09447	7.78115	8.76089	8.97018	9.47682	9.69464	9.49553	7.50852
			ΔU PUF/G, J/mol	-46012.7	-53956.1	-60633.8	-68474.7	-68710.8	-77757.5	-78016.2	-82657.8	-85163.7	-82456.2	-65828.5
			The density of PUF (g/cm3)	0.0245455
				Original empirical values
				KPUF/G	KPUF/G	KPUF/G	KPUF/G	KPUF/G	KPUF/G	KPUF/G	KPUF/G	KPUF/G	KPUF/G	KPUF/G
		Mean Temperature (℃)	Mean Temperature (K)	Tri-methylphosphate	Tri-ethylphosphate	Tri-n-propylphosphate	Tri-n-butylphosphate	Ally-2,4,6-tribromophenylether	2-bromoallyl-2,4,6-tribromophenylether	Pentabromobenzene	Pentabromotolouene	Pentabromoethylbenzene	Hexabromobenzene	Pentachloroanisole
		6	279.15	6430000	6690000	18800000	58500000	8870000	nd	18500000	28500000	22900000	nd	12100000
		20	293.15	2130000	1650000	4770000	19000000	1170000	7650000	7470000	14800000	15700000	23100000	2350000
		35	308.15	190000	139000	339000	1140000	320000	1200000	1520000	2290000	2850000	5260000	291000
			Predicted values	Empiricall Log (KPUF/G / ml/g) values
			Log (KPUF/G / ml/g)	Log (KPUF/G / ml/g)	Log (KPUF/G / ml/g)	Log (KPUF/G / ml/g)	Log (KPUF/G / ml/g)	Log (KPUF/G / ml/g)	Log (KPUF/G / ml/g)	Log (KPUF/G / ml/g)	Log (KPUF/G / ml/g)	Log (KPUF/G / ml/g)	Log (KPUF/G / ml/g)	Log (KPUF/G / ml/g)
	Mean Temperature (℃)	Mean Temperature (K)		Tri-methylphosphate	Tri-ethylphosphate	Tri-n-propylphosphate	Tri-n-butylphosphate	Ally-2,4,6-tribromophenylether	2-bromoallyl-2,4,6-tribromophenylether	Pentabromobenzene	Pentabromotoluene	Pentabromoethylbenzene	Hexabromobenzene	Pentachloroanisole
	6	279.15	5.2777	8.41824
	20	293.15	4.8665	7.93841
	35	308.15	4.46739	6.88878
		279.15	6.04788		8.43546
		293.15	5.5657		7.82751
		308.15	5.09769		6.75304
		279.15	6.71651			8.88419
		293.15	6.17465			8.28855
		308.15	5.64872			7.14023
		279.15	7.49468				9.37718
		293.15	6.88274				8.88878
		308.15	6.2888				7.66693
		279.15	8.18274					8.55795
		293.15	7.56869					7.67821
		308.15	6.97271					7.11518
		293.15	8.52046						8.49369
		308.15	7.846						7.68921
		279.15	9.42616							8.8772
		293.15	8.72895							8.48335
		308.15	8.05225							7.79187
		279.15	9.95993								9.06487
		293.15	9.22125								8.78029
		308.15	8.50428								7.96986
		279.15	10.1924									8.96986
		293.15	9.43132									8.80593
		308.15	8.69262									8.06487
		293.15	9.24058										8.97364
		308.15	8.52536										8.33101
		279.15	7.89327											8.69281
		293.15	7.30498											7.9811
		308.15	6.73399											7.07392

## Sheet: Tromp et al. 2019
				Acenaphthylene	Acenaphthene	Fluorene	Phenanthrene	Anthracene	Fluoranthene	Pyrene	2-Chlorobiphenyl (PRC)	3-Chlorobiphenyl (PRC)	4-Chlorobiphenyl (PRC)	2,6-Dichlorobiphenyl (PRC)	3,5-Dichlorobiphenyl (PRC)	2,3,4-Trichlorobiphenyl	2,4,4'-Trichlorobiphenyl	2,4,6-Trichlorobiphenyl	2,2',5,5'-Tetrachlorobiphenyl	2,2',4,6-Tetrachlorobiphenyl	2,3,3',4-Tetrachlorobiphenyl	3,3',4,5-Tetrachlorobiphenyl	2,2',4,6,6'-Pentachlorobiphenyl	2,2',3,4,6,6'-Hexachlorobiphenyl	Dimethyl phthalate	DEP-d4	Diethylpyrocarbonate	DIBP-d4	Diisobutyl phthalate	Dibutyl phthalate	chlorpropham	fluopyram-benzamide	pendimethalin	toclofos-methyl	1.6-dimethylnaphthalene	1-methylnaphthalene	2.6-dimethylnaphthalene	2-methylnaphthalene	naphtalene	triethyl phosphate	triisopropyl phosphate	tripropyl phosphate	tris(methylphenyl) phosphate	hexachloro-1,3-butadiene	pentachlorbenzene	hexachlorobenzene	alpha-1,2,3,4,5,6-Hexachlorocyclohexane	beta-Hexachlorocyclohexane	1,2,3,4,5,6-gamma-Hexachlorocyclohexane
			CAS-RN	208-96-8	83-32-9	86-73-7	85-01-8	120-12-7	206-44-0	129-00-0	2051-60-7	2051-61-8	2051-62-9	33146-45-1	34883-41-5	55702-46-0	7012-37-5	35693-92-6	35693-99-3	62796-65-0	74338-24-2	70362-49-1	56558-16-8	74472-40-5	131-11-3	93952-12-6	1609-47-8	358730-88-8	84-69-5	84-74-2	101-21-3	658066-35-4	40487-42-1	57018-04-9	575-43-9	90-12-0	581-42-0	91-57-6	91-20-3	78-40-0	513-02-0	513-08-6	78-32-0	87-68-3	608-93-5	118-74-1	319-84-6	319-85-7	58-89-9
			SMILES	c1cc2cccc3c2c(c1)C=C3	c1cc2cccc3c2c(c1)CC3	c1ccc2c(c1)Cc1c2cccc1	c1ccc2c(c1)c1ccccc1cc2	c1ccc2c(c1)cc1c(c2)cccc1	c1ccc2c(c1)c1cccc3c1c2ccc3	c1cc2ccc3c4c2c(c1)ccc4ccc3	Clc1ccccc1c1ccccc1	Clc1cccc(c1)c1ccccc1	Clc1ccc(cc1)c1ccccc1	Clc1cccc(c1c1ccccc1)Cl	Clc1cc(Cl)cc(c1)c1ccccc1	Clc1ccc(c(c1Cl)Cl)c1ccccc1	Clc1ccc(cc1)c1ccc(cc1Cl)Cl	Clc1cc(Cl)c(c(c1)Cl)c1ccccc1	Clc1ccc(cc1c1cc(Cl)ccc1Cl)Cl	Clc1cc(Cl)c(c(c1)Cl)c1ccccc1Cl	Clc1cccc(c1)c1ccc(c(c1Cl)Cl)Cl	Clc1cccc(c1)c1cc(Cl)c(c(c1)Cl)Cl	Clc1cc(Cl)c(c(c1)Cl)c1c(Cl)cccc1Cl	Clc1cc(Cl)c(c(c1c1c(Cl)cccc1Cl)Cl)Cl	COC(=O)c1ccccc1C(=O)OC	CCOC(=O)C1=CC=CC=C1C(=O)OCC	CCOC(=O)OC(=O)OCC	CC(C)COC(=O)C1=CC=CC=C1C(=O)OCC(C)C	CC(COC(=O)c1ccccc1C(=O)OCC(C)C)C	CCCCOC(=O)c1ccccc1C(=O)OCCCC	CC(OC(=O)Nc1cccc(c1)Cl)C	C1=CC=C(C(=C1)C(=O)NCCC2=C(C=C(C=N2)C(F)(F)F)Cl)C(F)(F)F	CCC(Nc1c(cc(c(c1N(=O)=O)C)C)N(=O)=O)CC	CC1=CC(=C(C(=C1)Cl)OP(=S)(OC)OC)Cl	Cc1ccc2c(c1)cccc2C	Cc1cccc2c1cccc2	Cc1ccc2c(c1)ccc(c2)C	Cc1ccc2c(c1)cccc2	c1ccc2c(c1)cccc2	CCOP(=O)(OCC)OCC	CC(C)OP(=O)(OC(C)C)OC(C)C	CCCOP(=O)(OCCC)OCCC	CC1=CC=C(C=C1)OP(=O)(OC2=CC=C(C=C2)C)OC3=CC=C(C=C3)C	ClC(=C(Cl)Cl)C(=C(Cl)Cl)Cl	Clc1cc(Cl)c(c(c1Cl)Cl)Cl	Clc1c(Cl)c(Cl)c(c(c1Cl)Cl)Cl	Cl[C@@H]1[C@H](Cl)[C@@H](Cl)[C@H]([C@@H]([C@H]1Cl)Cl)Cl	Cl[C@@H]1[C@@H](Cl)[C@H](Cl)[C@H]([C@@H]([C@H]1Cl)Cl)Cl	Cl[C@@H]1[C@H](Cl)[C@@H](Cl)[C@@H]([C@@H]([C@H]1Cl)Cl)Cl
			E	1.75	1.6	1.59	2.06	2.29	2.38	2.81	1.48	1.51	1.5	1.66	1.65	1.77	1.76	1.74	1.9	1.86	1.92	1.94	1.98	2.13	0.78	0.73	-0.04	0.68	0.68	0.7	0.95	0.56	1.39	1.24	1.37	1.34	1.35	1.3	1.34	0	-0.11	0.05	1.61	1.02	1.33	1.49	1.45	1.45	1.45
			S	1.14	1.05	1.06	1.29	1.34	1.55	1.71	1.07	1.05	1.05	1.22	1.18	1.33	1.33	1.35	1.48	1.48	1.46	1.44	1.61	1.74	1.26	1.26	0.89	1.21	1.21	1.27	1.25	0.97	1.39	0.9	0.94	0.94	0.82	0.81	0.92	1.12	0.57	1	1.82	0.44	0.92	0.99	1.2	1.28	1.28
			A	0	0	0	0	0	0	0	0	0	0	0	0	0	0	0	0	0	0	0	0	0	0	0	0	0	0	0	0.29	0.39	0.16	0	0	0	0	0	0	0	0	0	0	0	0.06	0	0	0	0
			B	0.26	0.22	0.25	0.26	0.28	0.24	0.28	0.2	0.18	0.18	0.2	0.16	0.15	0.15	0.17	0.15	0.15	0.13	0.11	0.13	0.11	0.88	0.9	0.76	0.95	0.95	0.95	0.52	0.66	0.71	0.63	0.21	0.22	0.25	0.25	0.2	1.05	1.15	1.15	1.1	0.15	0	0	0.47	0.5	0.5
			V	1.2156	1.2586	1.3565	1.4544	1.4544	1.5846	1.5846	1.4466	1.4466	1.4466	1.569	1.569	1.6914	1.6914	1.6914	1.8138	1.8138	1.8138	1.8138	1.9362	2.0586	1.4288	1.7106	1.1615	2.2742	2.2742	2.2742	1.5766	1.1668	2.1509	1.9281	1.3672	1.2263	1.3672	1.2263	1.0854	1.3934	1.8161	1.8161	2.7941	1.3206	1.3284	1.4508	1.5798	1.5798	1.5798
			L	6.175	6.469	6.922	7.632	7.568	8.827	8.833	6.336	6.667	6.718	6.765	7.365	7.907	7.904	7.39	8.144	7.854	8.717	9.039	8.244	8.928	6.275	7.214	4.115	8.88	8.88	8.97	6.967	4.676	9.005	8.122	6.347	5.802	6.146	5.617	5.161	5.001	4.782	6.18	12.669	5.329	6.63	7.39	7.34	7.57	7.57
			source of solute descriptors	LSER Dataset for CompTox users (2017)	Sprunger, L., Proctor, A., Acree, W. E., Abraham, M. H. (2007) J. Chromatogr. A, 1175, 162-173.	Sprunger, L., Proctor, A., Acree, W. E., Abraham, M. H. (2007) J. Chromatogr. A, 1175, 162-173.	Sprunger, L., Proctor, A., Acree, W. E., Abraham, M. H. (2007) J. Chromatogr. A, 1175, 162-173.	Sprunger, L., Proctor, A., Acree, W. E., Abraham, M. H. (2007) J. Chromatogr. A, 1175, 162-173.	Sprunger, L., Proctor, A., Acree, W. E., Abraham, M. H. (2007) J. Chromatogr. A, 1175, 162-173.	Sprunger, L., Proctor, A., Acree, W. E., Abraham, M. H. (2007) J. Chromatogr. A, 1175, 162-173.	Abraham, M. H., Al-Hussaini, A. J. M. (2005) J. Env. Monitor., 7, 295-301.	Abraham, M. H., Al-Hussaini, A. J. M. (2005) J. Env. Monitor., 7, 295-301.	Abraham, M. H., Al-Hussaini, A. J. M. (2005) J. Env. Monitor., 7, 295-301.	Abraham, M. H., Al-Hussaini, A. J. M. (2005) J. Env. Monitor., 7, 295-301.	Abraham, M. H., Al-Hussaini, A. J. M. (2005) J. Env. Monitor., 7, 295-301.	Abraham, M. H., Al-Hussaini, A. J. M. (2005) J. Env. Monitor., 7, 295-301.	Abraham, M. H., Al-Hussaini, A. J. M. (2005) J. Env. Monitor., 7, 295-301.	Abraham, M. H., Al-Hussaini, A. J. M. (2005) J. Env. Monitor., 7, 295-301.	Abraham, M. H., Al-Hussaini, A. J. M. (2005) J. Env. Monitor., 7, 295-301.	Abraham, M. H., Al-Hussaini, A. J. M. (2005) J. Env. Monitor., 7, 295-301.	Abraham, M. H., Al-Hussaini, A. J. M. (2005) J. Env. Monitor., 7, 295-301.	Abraham, M. H., Al-Hussaini, A. J. M. (2005) J. Env. Monitor., 7, 295-301.	Abraham, M. H., Al-Hussaini, A. J. M. (2005) J. Env. Monitor., 7, 295-301.	Abraham, M. H., Al-Hussaini, A. J. M. (2005) J. Env. Monitor., 7, 295-301.	LSER Dataset for CompTox users (2017)	LSER Dataset for CompTox users (2017)	Calculated	Abraham, M.H, Acree, W.E. Jr. (2015) Chemosphere., 119, 871-880	LSER Dataset for CompTox users (2017)	LSER Dataset for CompTox users (2017)	LSER Dataset (2017)	Calculated	LSER Dataset (2017)	Calculated	LSER Dataset for CompTox users (2017)	Sprunger, L., Proctor, A., Acree, W. E., Abraham, M. H. (2007) J. Chromatogr. A, 1175, 162-173.	Sprunger, L., Proctor, A., Acree, W. E., Abraham, M. H. (2007) J. Chromatogr. A, 1175, 162-173.	Sprunger, L., Proctor, A., Acree, W. E., Abraham, M. H. (2007) J. Chromatogr. A, 1175, 162-173.	Sprunger, L., Proctor, A., Acree, W. E., Abraham, M. H. (2007) J. Chromatogr. A, 1175, 162-173.	Abraham, M.H., Acree, W.E. (2013) Sep. Sci. Technol. 48, 884-897	Calculated	Abraham, M. H., Acree, W. E. (2004) New J. Chem., 28, 1538-1543.	LSER Dataset (2017)	Abraham, M. H., Ibrahim, A., Acree, Jr. W. E. (2007) Fluid Phase Eq., 251, 93.	Abraham, M. H., Ibrahim, A., Acree, Jr. W. E. (2007) Fluid Phase Eq., 251, 93.	Sprunger, L., Proctor, A., Acree, W. E., Abraham, M. H. (2007) J. Chromatogr. A, 1175, 162-173.	Goss, Arp, Bronner, Niederer , JCED 2008	Goss, Arp, Bronner, Niederer JCED 2008	Abraham, M. H., Enomoto, K., Clarke, E. D., Sexton, G. (2002) J. Org. Chem., 67, 4782-4786.
			Log KPUF/G (15℃) in mLair/gsorbent	6.55066	6.62431	6.98867	7.89411	7.93017	9.20151	9.46657	6.61324	6.81565	6.85186	7.19538	7.55618	8.21855	8.21642	7.88408	8.66437	8.45847	9.0386	9.23462	8.98031	9.7109	6.87483	7.6176	4.66596	8.87113	8.87113	9.03283	8.37285	6.5182	9.76239	7.73421	6.38771	5.96272	6.0494	5.61947	5.43697	5.73253	4.79467	6.48815	12.696	4.83735	6.74897	7.23232	7.57395	7.86765	7.86765
			ΔU PUF/G, J/mol	-57080.5	-57311.1	-60688.1	-69042.2	-69647	-80423.3	-83265.1	-59497.6	-60568.9	-60788.2	-65549	-67425	-73962.3	-73949.4	-72091.2	-79188.2	-77941.2	-81300.1	-82332.7	-83472.9	-90268.8	-62351.5	-69996.2	-43130	-83494.1	-83494.1	-84937.1	-80556.9	-65192.2	-93077.3	-70348.6	-56240.6	-52093.6	-53264.3	-49010.1	-47181.7	-53956.1	-48745	-62324.4	-117178	-42466.7	-59404.8	-62675.6	-67807.8	-70204.8	-70204.8
			The density of PUF (g/cm3)	0.022
				Original empirical values
				Log KPUF/G	Log KPUF/G	Log KPUF/G	Log KPUF/G	Log KPUF/G	Log KPUF/G	Log KPUF/G	Log KPUF/G	Log KPUF/G	Log KPUF/G	Log KPUF/G	Log KPUF/G	Log KPUF/G	Log KPUF/G	Log KPUF/G	Log KPUF/G	Log KPUF/G	Log KPUF/G	Log KPUF/G	Log KPUF/G	Log KPUF/G	Log KPUF/G	Log KPUF/G	Log KPUF/G	Log KPUF/G	Log KPUF/G	Log KPUF/G	Log KPUF/G	Log KPUF/G	Log KPUF/G	Log KPUF/G	Log KPUF/G	Log KPUF/G	Log KPUF/G	Log KPUF/G	Log KPUF/G	Log KPUF/G	Log KPUF/G	Log KPUF/G	Log KPUF/G	Log KPUF/G	Log KPUF/G	Log KPUF/G	Log KPUF/G	Log KPUF/G	Log KPUF/G
		Mean Temperature (℃)	Mean Temperature (K)	Acenaphthylene	Acenaphthene	Fluorene	Phenanthrene	Anthracene	Fluoranthene	Pyrene	2-Chlorobiphenyl (PRC)	3-Chlorobiphenyl (PRC)	4-Chlorobiphenyl (PRC)	2,6-Dichlorobiphenyl (PRC)	3,5-Dichlorobiphenyl (PRC)	2,3,4-Trichlorobiphenyl	2,4,4'-Trichlorobiphenyl	2,4,6-Trichlorobiphenyl	2,2',5,5'-Tetrachlorobiphenyl	2,2',4,6-Tetrachlorobiphenyl	2,3,3',4-Tetrachlorobiphenyl	3,3',4,5-Tetrachlorobiphenyl	2,2',4,6,6'-Pentachlorobiphenyl	2,2',3,4,6,6'-Hexachlorobiphenyl	Dimethyl phthalate	DEP-d4	Diethylpyrocarbonate	DIBP-d4	Diisobutyl phthalate	Dibutyl phthalate	chlorpropham	fluopyram-benzamide	pendimethalin	toclofos-methyl	1.6-dimethylnaphthalene	1-methylnaphthalene	2.6-dimethylnaphthalene	2-methylnaphthalene	naphtalene	triethyl phosphate	triisopropyl phosphate	tripropyl phosphate	tris(methylphenyl) phosphate	hexachloro-1,3-butadiene	pentachlorbenzene	hexachlorobenzene	alpha-1,2,3,4,5,6-Hexachlorocyclohexane	beta-Hexachlorocyclohexane	1,2,3,4,5,6-gamma-Hexachlorocyclohexane
		20.7	293.85	5.09	5.07	5.61	6.22	6.59	7.08	7.19	5	5.35	5.39	5.49	5.87	6.45	6.44	5.85	6.75	6.34	7.11	7.28	6.72	7.22	5.58	5.64	5.58	5.93	6.81	6.84	6.93	6.77	7.1	7.26	4.52	4.1	4.44	4.04	3.81	5.32	4.58	5.48	6.66	3.39	4.79	5.4	6.04	7.27	6.41
			Predicted values	Empiricall Log (KPUF/G / ml/g) values
			Log (KPUF/G / ml/g)	Log (KPUF/G / ml/g)	Log (KPUF/G / ml/g)	Log (KPUF/G / ml/g)	Log (KPUF/G / ml/g)	Log (KPUF/G / ml/g)	Log (KPUF/G / ml/g)	Log (KPUF/G / ml/g)	Log (KPUF/G / ml/g)	Log (KPUF/G / ml/g)	Log (KPUF/G / ml/g)	Log (KPUF/G / ml/g)	Log (KPUF/G / ml/g)	Log (KPUF/G / ml/g)	Log (KPUF/G / ml/g)	Log (KPUF/G / ml/g)	Log (KPUF/G / ml/g)	Log (KPUF/G / ml/g)	Log (KPUF/G / ml/g)	Log (KPUF/G / ml/g)	Log (KPUF/G / ml/g)	Log (KPUF/G / ml/g)	Log (KPUF/G / ml/g)	Log (KPUF/G / ml/g)	Log (KPUF/G / ml/g)	Log (KPUF/G / ml/g)	Log (KPUF/G / ml/g)	Log (KPUF/G / ml/g)	Log (KPUF/G / ml/g)	Log (KPUF/G / ml/g)	Log (KPUF/G / ml/g)	Log (KPUF/G / ml/g)	Log (KPUF/G / ml/g)	Log (KPUF/G / ml/g)	Log (KPUF/G / ml/g)	Log (KPUF/G / ml/g)	Log (KPUF/G / ml/g)	Log (KPUF/G / ml/g)	Log (KPUF/G / ml/g)	Log (KPUF/G / ml/g)	Log (KPUF/G / ml/g)	Log (KPUF/G / ml/g)	Log (KPUF/G / ml/g)	Log (KPUF/G / ml/g)	Log (KPUF/G / ml/g)	Log (KPUF/G / ml/g)	Log (KPUF/G / ml/g)
	Mean Temperature (℃)	Mean Temperature (K)		Acenaphthylene	Acenaphthene	Fluorene	Phenanthrene	Anthracene	Fluoranthene	Pyrene	2-Chlorobiphenyl (PRC)	3-Chlorobiphenyl (PRC)	4-Chlorobiphenyl (PRC)	2,6-Dichlorobiphenyl (PRC)	3,5-Dichlorobiphenyl (PRC)	2,3,4-Trichlorobiphenyl	2,4,4'-Trichlorobiphenyl	2,4,6-Trichlorobiphenyl	2,2',5,5'-Tetrachlorobiphenyl	2,2',4,6-Tetrachlorobiphenyl	2,3,3',4-Tetrachlorobiphenyl	3,3',4,5-Tetrachlorobiphenyl	2,2',4,6,6'-Pentachlorobiphenyl	2,2',3,4,6,6'-Hexachlorobiphenyl	Dimethyl phthalate	DEP-d4	Diethylpyrocarbonate	DIBP-d4	Diisobutyl phthalate	Dibutyl phthalate	chlorpropham	fluopyram-benzamide	pendimethalin	toclofos-methyl	1.6-dimethylnaphthalene	1-methylnaphthalene	2.6-dimethylnaphthalene	2-methylnaphthalene	naphtalene	triethyl phosphate	triisopropyl phosphate	tripropyl phosphate	tris(methylphenyl) phosphate	hexachloro-1,3-butadiene	pentachlorbenzene	hexachlorbenzene	alpha-1,2,3,4,5,6-Hexachlorocyclohexane	beta-Hexachlorocyclohexane	1,2,3,4,5,6-gamma-Hexachlorocyclohexane
	20.7	293.85	6.34994	6.74758
		293.85	6.42278		6.72758
		293.85	6.77527			7.26758
		293.85	7.65132				7.87758
		293.85	7.68526					8.24758
		293.85	8.91871						8.73758
		293.85	9.17377							8.84758
		293.85	6.40402								6.65758
		293.85	6.60266									7.00758
		293.85	6.6381										7.04758
		293.85	6.96488											7.14758
		293.85	7.31908												7.52758
		293.85	7.95846													8.10758
		293.85	7.95638														8.09758
		293.85	7.63057															7.50758
		293.85	8.3859																8.40758
		293.85	8.18439																	7.99758
		293.85	8.75271																		8.76758
		293.85	8.9451																			8.93758
		293.85	8.68679																				8.37758
		293.85	9.39348																					8.87758
		293.85	6.65557																						7.23758
		293.85	7.37146																							7.29758
		293.85	4.51429																								7.23758
		293.85	8.57753																									7.58758
		293.85	8.57753																										8.46758
		293.85	8.73416																											8.49758
		293.85	8.08958																												8.58758
		293.85	6.28895																													8.42758
		293.85	9.43509																														8.75758
		293.85	7.48683																															8.91758
		293.85	6.18995																																6.17758
		293.85	5.77954																																	5.75758
		293.85	5.8621																																		6.09758
		293.85	5.44713																																			5.69758
		293.85	5.27106																																				5.46758
		293.85	5.54279																																					6.97758
		293.85	4.62326																																						6.23758
		293.85	6.26899																																							7.13758
		293.85	12.2839																																								8.31758
		293.85	4.68802																																									5.04758
		293.85	6.54007																																										6.44758
		293.85	7.01192																																											7.05758
		293.85	7.3355																																												7.69758
		293.85	7.62077																																													8.92758
		293.85	7.62077																																														8.06758
		293.85	7.12653
		293.85	8.30146
		293.85	7.95827
		293.85	7.94268
		293.85	8.17873
		293.85	8.4394
		293.85	8.8562
		293.85	9.60983
		293.85	8.74004
		293.85	8.85414
		293.85	10.1521
		293.85	9.00188
		293.85	8.62042
		293.85	7.79509
		293.85	7.99698
		293.85	6.42278
		293.85	9.4823
		293.85	8.30802
		293.85	8.89186
		293.85	8.20611
		293.85	9.90147
		293.85	9.3537
		293.85	8.83864
		293.85	10.1185
		293.85	5.4313
		293.85	7.06682
		293.85	7.60392
		293.85	6.76934
		293.85	9.06276
		293.85	8.01984
		293.85	7.9533
		293.85	7.44456
		293.85	8.27183
		293.85	7.76834
[truncated: 34 more columns]

## Sheet: CB_DATA_
Crystal Ball Data
Workbook Variables	Last Var Column	0
Name:
Value:
Worksheet Data	Last Data Column Used
	2
Sheet Ref
#REF!	#REF!
Sheet Guid
1d83a476-34db-4f43-9cb9-af41a4682e06	41af6f73-8485-4ed0-b4dc-36b05e5baece
Deleted sheet count
	4
Last row used
28	26
Data blocks
CB_Block_0
㜸〱敤㕣㕢㙣ㅣ搷㜹摥㌳摣㕤敥㉣㐹㤱ㄶ㘵搹㜲ㅣ㥢㡥攳㑢㑣㤵ㄶ㘵㉢戶搳慡㉡㉦搶挵愱㐴㕡㑢挹㌱ㄲ㘳㌵摣㍤㈳㡥戵㌳㐳捦捣㔲愲㙢挰㐶敡挴㉥摡㈴㐰搲ㄶ㜵攳㈶㠱ㄱㄸ挸㐳搲收挵戱㤳㈰㐸㠱〲〹〲〷挸㠳昳㄰愰て㙥㄰戴てつ〲〵㜹㜱㠱〰改昷㥤㤹搹㥤搹攵づ改戵摤搲〵㡦扣㍦捦㥣摢㥣㜳晥敢昹晦㌳捥㠹㕣㉥昷〷㈴晥㘵捡㌳㜳㘳㘵挳て愴㍤㌵攷㌶ㅡ戲ㄶ㔸慥攳㑦捤㜸㥥戱戱㘰昹挱〰ㅡㄴ慢ㄶ敡晤㐲搵户㥥㤴愵敡扡昴㝣㌴㉡攴㜲愵㤲慥愱㥥㠳昰㌷ㄶ㍦攸散㌵㥣〷㔸㥥㥢㕤㕣㜹ㅣ愳㔶〲搷㤳〷㈷捥㠷㝤㡦㑥㑦㑦㑤㑦摤㝢摦昴㐷愷づㅤ㥣㤸㙢㌶㠲愶㈷㡦㍡戲ㄹ㜸㐶攳攰挴㔲㜳愵㘱搵㍥㉥㌷㤶摤㑢搲㌹㉡㔷づ摤戳㘲摣㝢晦昴扤㐷㡥㤸て㍣㜰晦㌰㕥㥤㍢㌳㌷扢攴㐹搳㝦㤷挶㉣㜰捡昷捥换㥡挵戵㐹改㔹捥挵愹戹㔹晣㤷㤸㍦㥥敥㥢慡慣㑡ㄹ昰搵搲㤳㑥㑤晡㍡㍡づ搹㌳扥摦戴搷戸㜹扡㝤ㅣ㑢慤ㄹ㝥㔰戰攷㘴愳愱摢昱愸㈵㝢ㄱ㝢搷㌰㌶㠶敤㡡㜴㝣㉢戰搶慤㘰愳㘸㉦㘳愰晡㠸㝤捥㤷㘷つ攷愲㍣㘳搸戲㘰㥦㘸㕡昵㝣…
Decisioneering:7.0.0.0
